# 1 Phylogenetic diversity analysis of shotgun 2 metagenomic reads describes gut microbiome 3 development and treatment effects in the 4 post-weaned pig

5  
6 Daniela Gaio<sup>1</sup>, Matthew Z. DeMaere<sup>1</sup>, Kay Anantanawat<sup>1</sup>, Graeme J Eamens<sup>2</sup>, Tiziana Zingali<sup>1</sup>,  
7 Linda Falconer<sup>2</sup>, Toni A. Chapman<sup>2</sup>, Steven Djordjevic<sup>1</sup>, Aaron E. Darling<sup>1\*</sup>

8  
9 <sup>1</sup>The iThree institute, University of Technology Sydney, Sydney, NSW, Australia

10 <sup>2</sup>NSW Department of Primary Industries, Elizabeth Macarthur Agricultural Institute, Menangle,  
11 NSW, Australia

12

13 Corresponding author:

14 Daniela Gaio<sup>1</sup>

15 The iThree institute, University of Technology Sydney, P.O. Box 123, Broadway, NSW, 2007,  
16 Australia

17 [d.gαιο@outlook.com](mailto:d.gαιο@outlook.com)

18

## 19 **Abstract**

20 **Background:** Intensive farming practices can increase exposure of animals to infectious agents  
21 against which antibiotics are used. Besides leading to antimicrobial resistance (AMR), orally  
22 administered antibiotics are well known to cause dysbiosis. To counteract dysbiotic effects,  
23 numerous studies in the past two decades sought to understand whether probiotics are a valid  
24 tool to help re-establish a healthy gut microbial community after antibiotic treatment. However,  
25 although dysbiotic effects of antibiotics are well investigated, little is known about the effects of  
26 intramuscular antibiotic treatment on the gut microbiome and a few studies attempted to study  
27 treatment effects using phylogenetic diversity analysis techniques. In this study we sought to  
28 determine the effects of two probiotic- and one intramuscularly administered antibiotic treatment  
29 on the developing gut microbiome of post-weaning piglets between their 3<sup>rd</sup> and 9<sup>th</sup> week of life.

30 **Methods:** Shotgun metagenomic sequences from over 800 faecal time-series samples derived  
31 from 126 piglets and 42 sows were analysed in a phylogenetic framework to characterise the  
32 developing gut microbial community composition of post-weaning piglets. We assessed the  
33 effects of intramuscular antibiotic treatment and probiotic oral treatment on the diversity of these  
34 gut microbial communities using alpha and beta diversity measures.

35 **Results:** Differences between individual hosts such as breed, litter, and age, were found to be  
36 important contributors to variation in the community composition. Host age was the dominant  
37 factor in shaping the gut microbiota of piglets after weaning. The post-weaning pig gut  
38 microbiome appeared to follow a highly structured developmental program with characteristic  
39 post-weaning changes that can distinguish hosts that were born as little as two days apart in the  
40 second month of life. Treatment effects of the antibiotic and probiotic treatments were found but  
41 were subtle and included a higher representation of *Mollicutes* associated with intramuscular  
42 antibiotic treatment, and an increase of *Lactobacillus* associated with probiotic treatment.

43 **Discussion:** The discovery of correlations between experimental factors and microbial  
44 community composition is more commonly addressed with OTU-based methods and rarely  
45 analysed via phylogenetic diversity measures. The latter method, although less intuitive than the  
46 former, suffers less from library size normalization biases, and it proved to be instrumental in  
47 this study for the discovery of correlations between microbiome composition and host-, and  
48 treatment factors.

49

## 50 **Introduction**

51 As the world population grows, there is an accompanying demand for animal-derived products.  
52 Intensive animal husbandry and early weaning practices are commonly used to maximize  
53 production rates while minimizing costs. In a semi-natural environment, pig weaning occurs  
54 between the 12<sup>th</sup> and the 17<sup>th</sup> week following birth whereas in intensively farmed pigs it typically  
55 occurs at 3-4 weeks of age <sup>1,2</sup>. In intensive pig production early weaning practices increase the  
56 risk of enteric infections <sup>3-6</sup>, and thereby the need for antimicrobial strategies, which has  
57 included the common metaphylactic use of antibiotics <sup>7,8</sup>. Besides contributing to the concerning  
58 issue of antimicrobial resistance (AMR) build up, antibiotic usage causes dysbiosis <sup>9-11</sup>, a  
59 disruption of a balanced state within a gut microbial community, which increases the chance of

60 pathogens gaining a foothold (*i.e.*: colonization of the host or overgrowth) <sup>12,13</sup>. Researchers  
61 sought to determine the gut microbial modulatory effects of oral and in-feed antibiotic treatment  
62 in the pig <sup>10,11</sup>, mouse <sup>14–16</sup>, and human <sup>17</sup>, and only a few studies report the effects of  
63 intramuscular (IM) antibiotic treatment on the gut microbial community of the pig <sup>18,19</sup>.  
64 Dysbiosis following antibiotic treatment of the young pig via intramuscular (IM) <sup>20</sup> and  
65 subcutaneous <sup>9</sup> routes has been documented. It has been reported that a single dose of  
66 intramuscularly administered amoxicillin in pigs, immediately after birth, causes long lasting  
67 dysbiosis <sup>21</sup>, but no studies, to our knowledge, assessed the effects of IM neomycin treatment on  
68 the post-weaning pig gut microbiota. IM antibiotic use has a lower risk for inducing AMR than  
69 oral antibiotics in livestock production <sup>22–25</sup>, and according to a national survey of antibiotic use  
70 in 197 large Australian commercial pig herds, 9.6% reported the use of injectable  
71 apramycin/neomycin <sup>7</sup>. For these reasons it is relevant to the industry to assess if, and to what  
72 extent, IM neomycin causes dysbiosis.

73 Probiotics may play a role in counteracting the dysbiotic effects of antibiotics. Probiotic  
74 treatment has been reported to affect the physiology of the host by improving mucosal integrity  
75 <sup>26–29</sup>, inducing competitive exclusion against pathogenic species <sup>30–35</sup>, reducing intestinal  
76 inflammation <sup>26,36,37</sup>, and pathogen translocation <sup>26,38,39</sup>. In terms of microbial community  
77 modulating potential of probiotics, studies in swine using culture based methods reported the  
78 reduction of pathogenic species <sup>32,34,40–48</sup> and an increase of *Lactobacillus* species <sup>43,47–49</sup>  
79 following the administration of probiotic formulas. However, only in the past decade have  
80 advances in and higher accessibility to high-throughput sequencing techniques enabled  
81 researchers to better characterize microbial dynamics following probiotic treatment. Several of  
82 these studies used the amplification of the bacterial 16S rDNA V4 region, determining the  
83 effects of probiotics on the gut microbial community of swine <sup>50–53</sup>. The choice of shotgun  
84 metagenomic sequencing over amplicon sequencing, in this study, was dictated by the use of this  
85 dataset outside of the scope described in this manuscript. In this study we assessed the effects of  
86 two probiotic formulas on the gut microbial community of post-weaning piglets undergoing a  
87 two-weeks probiotic treatment immediately after weaning. To assess the effects on the microbial  
88 community of the administration of probiotic following antibiotic treatment, two treatment  
89 groups were administered IM neomycin treatment followed by two weeks of either of the two  
90 probiotic formulae.

91 The data was analysed from the perspective of the phylogenetic diversity of microbial  
92 communities. Firstly, we describe the phylogenetic diversity of microbial communities, and  
93 secondly, the role of age, breed and litter in microbial community composition. Finally, we  
94 describe the temporal effects on microbial communities, and the associated effects of IM  
95 neomycin and probiotic treatments.

96

## 97 **Materials & Methods**

98

### 99 ***Animal trial***

100 Metagenomic samples were derived from a pig study conducted at the Elizabeth Macarthur  
101 Agricultural Institute (EMAI) NSW, Australia, and approved by the EMAI Ethics Committee  
102 (Approval M16/04). Below, we briefly summarise the origin of the samples, with comprehensive  
103 details on the animal trial and sample workflow being described previously <sup>54</sup>.

104 Post-weaning piglets ( $n=126$ ) derived from a large commercial pig herd were transferred to  
105 the study facility in January 2017. Piglets, aged  $22.5\pm 2.5$  days at the start of the trial, consisted of  
106 4 main cross-breed types: “Duroc  $\times$  Landrace” ( $n=46$ ), “Duroc  $\times$  Large White” ( $n=59$ ),  
107 “Landrace  $\times$  cross bred (LW $\times$ D)” ( $n=9$ ), “Large White  $\times$  Duroc” ( $n=12$ ); and three pig lines  
108 (line 319:  $n=9$ ; line 316:  $n=46$ ; line 326:  $n=71$ ) <sup>54</sup>. The study facility consisted of 4  
109 environmentally controlled rooms (Rooms 1–4) with air conditioning, concrete slatted block  
110 flooring with underground drainage, and open rung steel pens. The floor was swept daily and the  
111 under-floor drainage was flushed twice weekly. A rubber ball was added to each pen for  
112 environmental enrichment. Piglets were fed *ad libitum*, a commercial pig grower mix of 17.95%  
113 protein, free of antibiotics.

114 The piglets were distributed over 6 treatment cohorts: a placebo group (Control  $n=29$ ); two  
115 probiotic groups (D-Scour  $n=18$ ; ColiGuard  $n=18$ ); one antibiotic group (Neomycin  $n=24$ ) and  
116 two antibiotic-then-probiotic treatment groups (Neomycin+D-Scour  $n=18$ ;  
117 Neomycin+ColiGuard  $n=18$ ). The commercial probiotic paste preparation D-Scour<sup>TM</sup> was  
118 sourced from International Animal Health, Australasia, and is composed of  $1.8 \times 10^8$  CFU/g of  
119 each of the following: *Lactobacillus acidophilus*, *Lactobacillus*

120 *delbrueckii* subspecies *bulgaricus*, *Lactobacillus plantarum*, *Lactobacillus rhamnosus*,  
121 *Bifidobacterium bifidum*, *E. faecium*, and *Streptococcus salivarius* subspecies *thermophilus*, with  
122 an additional 20mg/g of garlic extract (*Allium sativum*). ColiGuard® is a probiotic formulation  
123 developed for the treatment of entero-toxigenic *Escherichia coli* (ETEC) in weaner pigs,  
124 developed in collaboration between the NSW DPI and International Animal Health Product, and  
125 contains undefined concentrations of: *L. plantarum* and *Lactobacillus salivarius*. In addition, an  
126 in-house developed mock community was used as a positive control, composed of *Bacillus*  
127 *subtilis* strain 168, *Enterococcus faecium*, *Staphylococcus aureus* ATCC25923, *Staphylococcus*  
128 *epidermidis* ATCC35983, *Enterobacter hormaechei* CP\_032842, *Escherichia coli* K-12  
129 MG1655, and *Pseudomonas aeruginosa* PAO1, in the following proportions:  
130 8.7:13.0:7.7:16.7:38.9:14.5:0.4.

131 Groups of piglets were euthanized at the start (t0: n=6), a week after (t2: n=12), two weeks  
132 after the start of the trial (t4: n=36) and at the end of the trial (t10: n=72) to obtain biopsy  
133 samples that were used in another study. All surviving animals were euthanized at the end of the  
134 animal trial. Euthanasia occurred as follows: the piglets were restrained in dorsal recumbency in  
135 a bleeding cradle and pentobarbitone euthanasia solution (Lethabarb, Virbac Australia, 325 mg  
136 pentobarbitone sodium/mL) diluted 1:1 in sterile normal saline was administered via the precava  
137 using a 20-21G needle depending on pig weight. The piglets received a dose of approximately 30  
138 mg pentobarbitone/Kg to achieve deep anaesthesia, and then immediately exsanguinated.  
139 Exsanguination after a non-lethal dose of barbiturate was undertaken to reduce excessive  
140 congestion of the visceral blood vessels at the time of intestinal specimen collection (which is  
141 likely to occur if euthanasia is undertaken using an overdose of barbiturate alone).

142 Faecal sampling occurred twice weekly for a subset of the piglets (8 per cohort; n=48), while  
143 it occurred weekly for all the living piglets (n=126; see euthanasia groups described above). In  
144 addition, 42 faecal samples derived from the piglets' mothers (n=42), 18 samples derived from  
145 three distinct positive controls (D-Scour™, ColiGuard®, and mock community), and 20 negative  
146 controls were included.

147 A thorough description of the animal trial, and the metadata containing behaviour, weight,  
148 and faecal consistency scores recorded over the 6-week period of the trial, is available in our  
149 previous work<sup>54</sup>.

150

## 151 **Metagenomic samples processing**

152 Samples underwent homogenization and storage at -80 °C. After sample thawing, DNA  
153 extraction was performed with the PowerMicrobiome DNA/RNA EP kit (Qiagen), and libraries  
154 were prepared using the Hackflex method<sup>55</sup>. Sequencing was performed on three Illumina  
155 NovaSeq S4 flow cells, after library normalization and pooling. The data is deposited to the  
156 NCBI Short Read Archive under project PRJNA526405 and <http://dx.doi.org/10.5524/100890><sup>54</sup>.  
157 Samples were assessed for quality using FASTQC  
158 (<http://www.bioinformatics.babraham.ac.uk/projects/fastqc/>) and a combined report of all  
159 samples was obtained with MULTIQC<sup>56</sup> (available in our GitHub repository  
160 [https://github.com/GaioTransposon/metapigs\\_phylodiv](https://github.com/GaioTransposon/metapigs_phylodiv)).

161

## 162 **Determination of microbial diversity among samples**

163 Phylogenetic diversity of all samples was assessed with PhyloSift<sup>57</sup> using the first 1M read  
164 pairs of each sample (parameters: `--chunk-size 1000000 --paired`) (script:  
165 *phylosift.nf*). In addition, a separate analysis with PhyloSift<sup>57</sup> was performed using a smaller  
166 downsampling, by including only the first 100K read pairs of each sample (parameters: `--`  
167 `chunk-size 100000 --paired`). In order to test for associations of phylogenetic  
168 diversity with treatment, time of sampling, and differences among hosts at the start of the trial  
169 (first post-weaning sample collection time point), analysis of the unrooted phylogenetic diversity  
170 (PD)<sup>58</sup>, the balance weighted phylogenetic diversity (BWPD)<sup>59</sup> and principal component  
171 analysis (PCA) of the Kantorovich-Rubinstein distances<sup>60</sup> (beta diversity analysis) were  
172 performed. Collections of phylogenetic placements produced by PhyloSift are compared using  
173 guppy<sup>60</sup> to produce the Kantorovich-Rubenstein distances output. The collections of  
174 phylogenetic placements are grouped based on the variable of interest (*i.e.*: treatment, time of  
175 sampling, and differences among hosts at the start of the trial), and consequently the selection is  
176 fed to guppy. Guppy is used in two modalities: 1. `guppy epca` to obtain edge principal  
177 components; 2. `guppy fat` to annotate the edges of the phylogenetic tree using the relative  
178 abundance of reads placed on each lineage. Alpha-diversity and beta-diversity were analysed and  
179 the results were visualized with R<sup>61</sup> and R packages<sup>62-76</sup>. Scripts for the analysis are available at

180 [https://github.com/GaioTransposon/metapigs\\_phylodiv](https://github.com/GaioTransposon/metapigs_phylodiv). The data analysis workflow is  
181 schematically represented in **Figure 1**.

182 All samples were included in the analysis, except for the analysis of treatment effect, where,  
183 in order to minimize the effect of age as a confounding factor, we excluded animals born on  
184 2017-01-06 and on 2017-01-07. In this manner the largest age gap between animals was 3 days,  
185 with animals born on 2017-01-08 ( $n=24$ ), 2017-01-09 ( $n=24$ ), 2017-01-10 ( $n=23$ ), and 2017-01-  
186 11 ( $n=39$ ). As a result, sample sizes at each time point were the following: Control (t0: 26; t2:  
187 20; t4: 15; t6: 12; t8: 12; t10: 12), D-Scour™ (t0: 15; t2: 15; t4: 15; t6: 10; t8: 12; t10: 10),  
188 ColiGuard® (t0: 16; t2: 16; t4: 16; t6: 12; t8: 12; t10: 12), neomycin (t0: 22; t2: 22; t4: 17; t6: 12;  
189 t8: 12; t10: 12), neomycin+D-Scour™ (t0: 17; t2: 17; t4: 17; t6: 12; t8: 12; t10: 12), and  
190 neomycin+ColiGuard® (t0: 14; t2: 13; t4: 14; t6: 10; t8: 10; t10: 10).

191 Analysis of raw reads with SortMeRNA<sup>77</sup> (version 4.0.0) was performed as described in  
192 Gaio *et al* (2021)<sup>54</sup>. Briefly, raw reads were mapped against the rRNA reference database silva-  
193 bac-16s-id90.fasta (parameters: `--fastx --blast 1 --num_alignments 1`) (script:  
194 `sortmerna.sh`) and filtered based on e-value (e-value  $\leq 1e-30$ ), identity (identity  $\geq 80\%$ ), and  
195 alignment length (length  $\geq 100$  bp) (script: `sortmerna_filter.sh`).<sup>54</sup> The output from  
196 SortMeRNA<sup>77</sup> was used to compute Principal Component Analysis (PCA) with R<sup>61</sup> (script:  
197 `08_sortmerna.R`). Sample counts were normalized for library size by proportions and were tested  
198 with the Spearman's Rank correlation coefficient method to find lineages correlating with the  
199 weight of the piglets across the trial (script: `08_sortmerna.R`).

200

### 201 **Batch effects**

202 A randomized block design was adopted to mitigate batch effects. Because samples were  
203 distributed across ten 96-well plates during DNA extraction and library preparation, plate effects  
204 were expected. Although samples did not visibly cluster by DNA extraction plate across the first  
205 five principal components, a batch effect was found by multiple comparison analysis with  
206 ANOVA (alpha diversity:  $p$  range=0.0001-1; beta diversity:  $p$  value<0.0001) (**Supplementary**  
207 **Figure 1**). Significance of pairwise comparisons was obtained by running Tukey's *post-hoc*  
208 analysis (**Supplementary Table 1**). Batch effects were removed with ComBat<sup>78</sup> (script:

209 *02\_phylodiv.R*). ComBat relies on robust empirical Bayes regression to remove heterogeneity  
210 due to the use of batches (in this study a batch is a 96-well plate) while maintaining the  
211 biological variance among samples.<sup>78</sup> The input data used for ComBat in this study is not subject  
212 to normalization as it consists of phylogenetic diversity values obtained from a defined number  
213 of read-pairs per sample. A parametric adjustment was used in the batch effect correction  
214 (`par.prior=TRUE`) and both means and variances were adjusted (`mean.only=FALSE`).  
215

## 216 **Data availability**

217 The raw sequencing data has been submitted to the NCBI Short Read Archive under project  
218 PRJNA526405 and is also available through GigaDB at <http://dx.doi.org/10.5524/100890>. A  
219 thorough description of this dataset and the metadata has been reported previously<sup>54</sup>. Scripts  
220 used for the data analysis in this study are available in our GitHub repository  
221 [https://github.com/GaioTransposon/metapigs\\_phylodiv](https://github.com/GaioTransposon/metapigs_phylodiv).  
222

## 223 **Results**

224 PhyloSift<sup>57</sup> was employed as a means to study microbial community diversity among the  
225 samples, and to test for associations with treatment, time of sampling, and differences among  
226 hosts during the first week post-weaning. To this end, analysis of the unrooted phylogenetic  
227 diversity (PD)<sup>58</sup>, the balance weighted phylogenetic diversity (BWPD)<sup>59</sup>, and principal  
228 component analysis (PCA) of the Kantorovic-Rubinstein distances<sup>60</sup> (beta diversity analysis)  
229 were performed.

230

### 231 **Phylogenetic diversity of positive controls**

232 Unrooted PD was highest for positive control D-Scour™ (mean±SD=162.2±28.3), slightly lower  
233 for positive control ColiGuard® (mean±SD=129.9±50.0) and lowest for the mock community  
234 (mean±SD=123.6±28.4). BWPD was highest for positive control D-Scour™ (mean±SD:  
235 1.9±0.2), lower for the mock community (mean±SD: 1.6±0.1), and lowest for positive control  
236 ColiGuard® (mean±SD: 0.9±0.1). (**Supplementary Table 1; Supplementary Figure 2**).



237 Principal component analysis (PCA) of the Kantorovich-Rubenstein distances (beta  
238 diversity analysis) was performed on positive control samples. Samples clearly separated in PC1  
239 (accounting for 83.62% of the variation), where mock community samples clustered in the lower  
240 end of principal component 1 (PC1) showing a higher representation of *Enterobacteriaceae* and  
241 *Pseudomonadaceae*, while ColiGuard® and D-Scour™ samples clustered in the higher end of  
242 PC1, showing a higher representation of *Lactobacillales*. D-Scour™ samples clustered in the  
243 higher end of principal component 2 (PC2) (accounting for 14.52% of the variation), showing a  
244 higher representation of *Lactobacillus delbrueckii*, *Enterococcus faecium*, and *Bifidobacterium*,  
245 while in the lower end of PC2, mock community samples and ColiGuard® samples, forming two  
246 separate clusters, showed a higher representation of *Bacilli*, *Enterobacteriaceae*, and  
247 *Gammaproteobacteria*. (**Supplementary Figure 3**).

248

#### 249 **Phylogenetic diversity of piglet gut communities: host factors**

250 Based on Kruskal-Wallis one-way analysis of variance (Hommel adjusted *p* values to correct for  
251 multiple hypotheses testing), alpha diversity of the piglet samples did not cluster significantly by  
252 cross-breed type ( $p > 0.05$ ) or by pig line ( $p > 0.05$ ) in the first week post-weaning (**Figure 2**;  
253 **Supplementary Table 1**). A correlation of cross-breed type was found with beta diversity  
254 (principal component 3) at t2 ( $p=0.024$ ). (**Figure 2**; **Supplementary Table 1**)

255 The piglets differed slightly by age, being born between 1 and 5 days apart. Notably, we  
256 found a significant correlation between alpha diversity and the age of the piglets at the first  
257 sampling time point (unrooted PD:  $p < 0.0001$ ; BWPD:  $p=0.011$ ) (**Figure 2**; **Supplementary**  
258 **Table 1**) and between age and beta diversity at t2 (PC3:  $p=0.047$ ) and t7 (PC3:  $p=0.018$ ) (**Figure**  
259 **2**; **Supplementary Table 1**). As age groups were confounded with cross-breed types (*i.e.* not all  
260 age groups are represented by each of the four cross-breed types), we compared the phylogenetic  
261 diversity of age groups within each breed. As cross-breed types “Landrace × cross bred (LW ×  
262 D)” and “Large White × Duroc” had only a small number of piglets in each age group ( $n=9$  and  
263  $n=12$ , respectively), we tested for an association between phylogenetic diversity and age in  
264 cross-breeds “Duroc × Landrace” and “Duroc × Large White” ( $n=46$  and  $n=59$ , respectively).  
265 Among these cross-breeds, age in the “Duroc × Landrace” piglets ( $n=46$ ) correlates with alpha  
266 diversity during the first week post-weaning (unrooted PD:  $p=0.006$ ; BWPD:  $p=0.047$ ) and with

267 beta diversity at t2 (PC2:  $p=0.048$ ) (**Figure 2; Supplementary Figure 4; Supplementary Table**  
268 **1**).

269 As piglets were derived from 42 distinct sows (maternal sows) and nursed by either the  
270 same or a different sow (a nurse sow), a litter effect was expected and determined. Based on  
271 Hommel adjusted  $p$  values, a similarity of alpha phylogenetic diversity can be seen among  
272 piglets from the same maternal sow (unrooted PD:  $p=0.001$ ; BWPD:  $p=0.017$ ) and in piglets  
273 from the same nurse sow (unrooted PD:  $p=0.002$ ; BWPD:  $p=0.027$ ) (**Figure 2; Supplementary**  
274 **Table 1**). The litter effect described was found significant only in samples from the first week  
275 post-weaning as the significance of the correlations did not persist thereafter (**Figure 2;**  
276 **Supplementary Table 1**).

277

### 278 ***A strong effect of aging on phylogenetic diversity***

279 Beta diversity analysis of all samples revealed a distinct and consistent change of the microbial  
280 community over time in all piglets, regardless of the treatment. Beta diversity analysis was  
281 performed from all reads and from the analysis of 16S rDNA V4 region-containing reads.  
282 Samples collected immediately after weaning (t0) were characterized by a higher representation  
283 of *Bacteroidetes* chlorobi group and *Clostridia* (PC1, 47.68%), particularly of *Sedimibacterium*  
284 and *Desulfosporosinus* (PC2 17.2%), respectively. Between day 0 (t0; immediately after  
285 weaning) and day 14 (t4), samples shifted towards a higher representation of *Bifidobacterium*  
286 and *Lactobacillus*, as measured from beta diversity analysis (PC1; 47.68% var. explained) and  
287 from analysis of 16S rRNA reads (PC1 and PC2; 23.9% and 17.2% var. explained, respectively).  
288 During the last two weeks (t6-t10), corresponding to day 21 and 35 of post-weaning, samples  
289 shifted towards a higher representation of *Actinobacteria*, (PC2 21.79% var. explained),  
290 particularly of *Collinsella* (PC1 23.9%, PC2 17.2%). Lineages of the *Erysipelotrichales*  
291 *Catenibacterium* and *Solobacterium* were also found to be representative of samples of this time  
292 interval (t6-t10). (**Figure 3**).

293 Beta diversity analysis was performed separately for samples within each time point in order  
294 to find lineages associated with variation within each time point. Extent of variation was derived  
295 from the product of branch width by the variation explained by the principal component (**Figure**

296 4). The lineages *Enterobacteriaceae* ( $t_0=0.05$ ) and *Bacteroides* ( $t_0=0.06$ ) were responsible for  
297 variation only during the first week after weaning, and *Methanobrevibacter smithii* during the  
298 first and the second week ( $t_0=0.05$ ;  $t_2=0.03$ ). The *Bifidobacterium* lineage was responsible for  
299 variation in the second week ( $t_2=0.09$ ). The following lineages were responsible for variation  
300 throughout the 6 weeks after weaning: *Bacteroidales* (min=0.04; max=0.20), *Prevotellaceae*  
301 (min=0.02; max=0.13), *Coriobacteriaceae* (min=0.01; max=0.09). *Lactobacillus* became  
302 variable after the first week post-weaning and remained highly variable throughout the rest of the  
303 trial (min=0.03; max=0.30) (**Figure 4**).

304 Taxonomic representation in terms of relative abundance was derived from the branch width  
305 of the phylogenetic tree (**Supplementary Figure 5**) and combined with PhyloSift's taxonomic  
306 annotation of the marker gene phylogeny. *Lactobacillus acidophilus* increased at the start  
307 ( $t_0=0.00$ ;  $t_2=0.07$ ;  $t_4=0.17$ ) then decreased ( $t_6=0.11$ ;  $t_8=0.06$ ;  $t_{10}=0.08$ ). Among other prevalent  
308 lineages during the week after weaning, up to the next week and dropping at later time points, we  
309 found *Methanobrevibacter smithii* ( $t_0=0.05$ ;  $t_2=0.03$ ) and *Bacteroidales* ( $t_0=0.01$ ;  $t_2=0.01$ ).  
310 Following an opposite trend we found *Ruminococcus* sp. JC304 ( $t_0=0.00$ ;  $t_2=0.00$ ;  $t_4=0.01$ ;  
311  $t_6=0.03$ ;  $t_8=0.03$ ;  $t_{10}=0.03$ ), *Solobacterium moorei* ( $t_0=0.00$ ;  $t_2=0.01$ ;  $t_4=0.02$ ;  $t_6=0.03$ ;  
312  $t_8=0.02$ ;  $t_{10}=0.03$ ) and *Prevotella copri* ( $t_0=0.00$ ;  $t_2=0.00$ ;  $t_4=0.05$ ;  $t_6=0.03$ ;  $t_8=0.06$ ;  $t_{10}=0.03$ ).  
313 In modest and stable abundance across the post-weaning period were the following lineages of  
314 the order of the *Clostridiales*: *Mogibacterium* sp. CM50 ( $t_0=0.03$ ;  $t_2=0.05$ ;  $t_4=0.03$ ;  $t_6=0.04$ ;  
315  $t_8=0.03$ ;  $t_{10}=0.04$ ), *Oscillibacter* ( $t_0=0.08$ ;  $t_2=0.06$ ;  $t_4=0.04$ ;  $t_6=0.03$ ;  $t_8=0.04$ ;  $t_{10}=0.03$ ),  
316 *Subdoligranulum variabile* ( $t_0=0.07$ ;  $t_2=0.03$ ;  $t_4=0.05$ ;  $t_6=0.07$ ;  $t_8=0.07$ ;  $t_{10}=0.08$ ), and  
317 *Ruminococcus bromii* ( $t_0=0.03$ ;  $t_2=0.02$ ;  $t_4=0.01$ ;  $t_6=0.01$ ;  $t_8=0.1$ ;  $t_{10}=0.01$ ). In transient  
318 abundance we found *Bifidobacterium thermophilum* RBL67 ( $t_2=0.02$ ;  $t_4=0.03$ ). Gradually  
319 increasing from the second week we found *Eubacterium bifforme* DSM3989 ( $t_2=0.02$ ;  $t_4=0.02$ ;  
320  $t_6=0.03$ ;  $t_8=0.03$ ;  $t_{10}=0.02$ ), *Eubacterium rectale* ( $t_4=0.03$ ;  $t_6=0.03$ ;  $t_8=0.03$ ;  $t_{10}=0.01$ ) and,  
321 after the third week, *Faecalibacterium prausnitzii* ( $t_6=0.01$ ;  $t_8=0.01$ ;  $t_{10}=0.01$ ).  
322 (**Supplementary Figure 5**)

323 The effect of time was also clear in alpha diversity, where all the piglet cohorts followed a  
324 similar trend over time, independent of the treatment (**Supplementary Figure 6**;  
325 **Supplementary Table 1**). Immediately after weaning ( $t_0$ ), the unrooted PD was lower for the

326 piglets than the sows (sows:  $328.5 \pm 24.0$ ; piglets:  $296.5 \pm 34.7$ ) and reached a higher unrooted PD  
327 to the sows' in the following week (t2) (piglets:  $336.18 \pm 33.0$ ) (**Supplementary Table 1**). In  
328 comparing four timepoints at one-week intervals from the start of the trial, changes in alpha  
329 diversity among all the piglets were tested for and significance was determined using the  
330 Bonferroni correction. Unrooted phylogenetic diversity increased in the first week following  
331 weaning (t0-t2: +9.15%;  $p < 0.001$ ) and decreased in the following week (t2-t4: -4.54%;  $p < 0.001$ )  
332 amongst the piglets. In contrast, BWPD decreased in the week after weaning (t0-t2: -6.07%;  
333  $p < 0.001$ ), to increase in the following week (t2-t4: +4.77%;  $p < 0.001$ ) and decrease in the fourth  
334 week (t4-t6: -3.67%;  $p = 0.002$ ). (**Supplementary Figure 6; Supplementary Table 1**).

335

### 336 ***Effect of antibiotic and probiotic treatment on alpha diversity***

337 We hypothesized that the probiotic treatments, whether alone (D-Scour™ and ColiGuard®) or  
338 administered after neomycin (neomycin+D-Scour™ and neomycin+ColiGuard®) would cause a  
339 change in the microbial community composition that would be measurable via phylogenetic  
340 diversity. We tested whether the treatments correlated with a change in phylogenetic diversity  
341 independently of the changes occurring with time. Given the differences in alpha and beta  
342 diversity detected among the subjects after weaning, we analyzed the deltas of phylogenetic  
343 diversity instead of relying on the absolute means, similar to the procedure applied by Kembel *et*  
344 *al* (2012)<sup>79</sup>. Time-point measurements of alpha diversity were taken, and deltas were computed  
345 for each piglet. Delta means were compared between cohorts, where the control cohort would  
346 serve as a control group for neomycin, D-Scour™ and ColiGuard® cohorts, whereas the  
347 neomycin cohort would serve as a control group for the neomycin+D-Scour™ and  
348 neomycin+ColiGuard® cohorts.

349 One week after weaning, 90% of the piglets displayed an increase in unrooted PD and 71%  
350 displayed a decrease of BWPD. The following week the trend was opposite: 72% of the piglets  
351 displayed an increase of BWPD and 76% displayed a decrease of unrooted PD (**Supplementary**  
352 **Table 1**). However, the neomycin cohort displayed the smallest BWPD drop in the week  
353 following weaning, and the overall trend of neomycin in unrooted PD was the most different  
354 from the other cohorts (**Supplementary Figure 6**). Due to the lower drop in BWPD of  
355 neomycin, significance was found in BWPD during the first week between neomycin and

356 Neomycin+ColiGuard® (t0-t2; Tukey adjusted  $p$  value=0.031), and between neomycin and  
357 ColiGuard® (t0-t2; Tukey adjusted  $p$  value=0.041). No other significant differences were found  
358 in changes in alpha diversity between time points among the cohorts. (**Supplementary Table 1**)

359

### 360 **Effect of antibiotic and probiotic treatment on beta diversity**

361 To investigate the treatment effect on beta diversity, principal component analysis (PCA) of the  
362 Kantorovich-Rubenstein distances (beta diversity analysis) was performed on all samples and,  
363 additionally, on samples within individual time points. This analysis is conceptually similar to  
364 the weighted Unifrac approach for beta diversity analysis, but is designed to work with  
365 phylogenetic placement data<sup>60</sup>. When examining all samples together, there was no clear  
366 separation of cohorts on any of the five principal component axes. When individual time points  
367 were analysed, some clustering by cohort was observed (**Supplementary Figure 7**). D-Scour™  
368 separated from the control cohort in PC3 (10.97%) during the first week of probiotic treatment  
369 (t2) (**Supplementary Figure 7**). ColiGuard® separated from control during the first week of  
370 probiotic treatment (t2) in PC5 (2.82%), and two weeks after the end of probiotic treatment in  
371 PC3 (7.87%), showing a higher representation of *Lactobacillus*.

372 Two weeks after the end of neomycin treatment (t6), neomycin separated from control in  
373 PC4 (5.65%), with a smaller clustering and a higher representation of *Mollicutes*. Neomycin+D-  
374 Scour™ separated from neomycin in PC2 (17.80%) and PC4 (5.65%) at the end of probiotic  
375 treatment (t6), as well as a week later (t9) in PC5 (3.93%). In these instances, neomycin clustered  
376 towards a higher representation of *Mollicutes*, while Neomycin+D-Scour™ showed a higher  
377 representation of *Lactobacillus*. (**Supplementary Figure 7**)

378

### 379 **Association between weight and community composition**

380 Weight correlated with the abundance of certain taxa at each time point as it resulted from  
381 principal component analysis of 16S rRNA reads. Positively correlating with weight we found  
382 among others: *Blautia* (t0), *Cetobacterium* (t0), *Lactobacillus* (t6), *Mycoplasma* (t6),  
383 *Anaerostipes* (t8), *Ruminococcus* (t8), *Cerasibacillus* (t10). Negatively correlating with weight  
384 we found among others: *Pyramidobacter* (t0), *Odoribacter* (t2), *Schwartzia* (t6), *Streptococcus*

385 (t6), *Dokdonella* (t8). Correlations remained significant after  $p$  value correction for multiple  
386 hypotheses testing (Hommel, and Benjamini & Yekutieli), but only one taxa  
387 (*Coprothermobacter*; t0) remained significantly, positively correlated with host weight after  
388 applying the more stringent Bonferroni correction (**Supplementary Table 1**).

389

### 390 ***Effect of treatments on weight gain***

391 Overall weight gain from initial to final weight (**Supplementary Table 1**) was not significantly  
392 affected by any treatment. However, the probiotic ColiGuard® was found to have a partial effect  
393 on piglet weight gain (**Supplementary Figure 8; Supplementary Table 1**). Weight was  
394 measured weekly for a total of six measurements. To minimize age as a confounding factor from  
395 this analysis, we kept samples from piglets that were born a max of 3 days apart. Based on Tukey  
396 adjusted  $p$  values, a lower weight gain was detected in the ColiGuard® cohort compared to the  
397 control cohort between the last day of probiotic treatment and a week after treatment (t4-t6)  
398 ( $p=0.015$ ) (**Supplementary Figure 8; Supplementary Table 1**). Similarly, a lower weight gain  
399 was detected in the neomycin+ColiGuard® cohort between the 9th day of treatment and the 9th  
400 day after probiotic treatment (t4-t8) compared to the neomycin cohort ( $p=0.011$ )  
401 (**Supplementary Figure 8; Supplementary Table 1**). Age and cross-breed differences among  
402 piglets were not associated with weight gain (**Supplementary Table 1**).

403

### 404 ***Estimation of phylogenetic diversity using sample downsampling sizes: 100K*** 405 ***versus 1M***

406 We compared unrooted PD and BWPD values obtained using either 100,000 or 1,000,000 reads  
407 per sample (corresponding to 0.612% or 6.12% of the average sample). The median unrooted PD  
408 was 2.6x higher, and variance improved when the analysis was run from 1M reads per sample,  
409 compared to the analysis run using 100K reads per sample (100K:  $121 \pm 18.67$ ; 1M:  $317 \pm 50.67$ ;  
410 Pearson's  $r=0.8965$ ), while the median BWPD remained nearly unchanged (100K:  $2.11 \pm 0.203$ ;  
411 1M:  $2.11 \pm 0.193$ ; Pearson's  $r=0.9747$ ). Comparing beta diversity values obtained using either  
412 100,000 or 1,000,000 reads per sample, we found a high correlation for all five principal  
413 components (Pearson's  $r$  range=0.9809-0.9956). (**Supplementary Figure 9**)

414

## 415 **Discussion**

416 The microbial composition of positive control samples was analysed from a taxonomic  
417 perspective in our previous study <sup>54</sup>, and it was here compared to the phylogenetic diversity  
418 obtained for these samples. The unrooted PD reflects the absolute diversity, independently of the  
419 relative abundance of each species, within a sample. In fact, low-level contamination (<0.1%)  
420 detected in each of the positive controls (mock community: 1 taxon; ColiGuard®: 20 taxa; D-  
421 Scour™ : 25 taxa) <sup>54</sup> contributes toward the absolute diversity in the unrooted PD, inflating this  
422 value. Unrooted PD values obtained for the positive controls were directly proportional to their  
423 respective count of taxa, which include contaminants (D-Scour™ :  $n=33$ ; ColiGuard®:  $n=22$ ;  
424 mock community:  $n=8$ ) <sup>54</sup>. On the other hand, the contribution to total diversity of phylogenetic  
425 tree edges with uneven quantities of reads placed on either side is down-weighted in BWPD. The  
426 fact that ColiGuard®, mock community, and D-Scour™ are mainly composed of 2, 7, and 8 taxa  
427 taking up even proportions in the samples, respectively (hence excluding contaminants) <sup>54</sup>, was  
428 reflected by their lowest, higher, and highest BWPD measured from these samples.

429 The consistent trend in community composition over time, across all the cohorts,  
430 indicates that an age-related process of ecological succession is the largest factor shaping the  
431 microbial community of post-weaning piglets, as found in this study where animals aged 20-63  
432 days were fed the same diet. A peak in unrooted phylogenetic diversity and drop in balance  
433 weighted phylogenetic diversity (BWPD) reflects the acquisition of new species with the loss of  
434 dominating species. Similarly to Pollock *et al* (2018) <sup>80</sup>, we found the relative abundance of  
435 *Clostridiales*, and *Lachnospiraceae* to decrease from the start of weaning to 2 weeks into  
436 weaning, while the relative abundance of *Lactobacillus*, *Prevotella copri*, *Faecalibacterium*  
437 *prausnitzii* and *Erysipelotrichaceae* increased. The increase of *Prevotella* with weaning <sup>80-82</sup> is  
438 well documented and it is associated with the increased polysaccharide consumption associated  
439 with the start of solid food consumption <sup>81,83</sup>. The relative abundance of *Lactobacillus* goes up  
440 with weaning, as other studies suggested <sup>80,81</sup>. However, according to our analysis, this increase  
441 concerns *Lactobacillus acidophilus*, while other *Lactobacillus* species, such as *Lactobacillus*  
442 *vaginalis* ATCC follow the opposite trend. We also found a clear gradual increase in abundance

443 of *Solobacterium moorei* and *Eubacterium bifforme* DSM3989, a transient increase of  
444 *Bifidobacterium thermophilum* RBL67 during the second and the third week post weaning, and a  
445 sharp decrease in the abundance of *Methanobrevibacter smithii* after the second week post-  
446 weaning.

447 The change in phylogenetic diversity detected in the week following the piglets' arrival at  
448 the trial site irrespective of the cohort, could be linked to the piglets being subjected to microbial  
449 interchange (*e.g.*: new pen mates) and/or to diet transition (peri-weaning transition) to solid food  
450 leading to the reshaping of the gut microbial community.<sup>84,85</sup> The week following the drop of  
451 BWPD, a significant increase of BWPD was recorded, reflecting the acquisition of a larger  
452 proportion of the community by the newly introduced species. The strong changes in  
453 phylogenetic diversity detected in the first and the second week could as well be attributable to  
454 other post-weaning related physiological changes, as previous studies report<sup>84-87</sup>.

455 The highest inter-individual differences among piglets are seen in the first week of life,  
456 irrespective of maternal or environmental effects. The microbiota of three week old piglets is still  
457 very dynamic, but environmental factors become evident<sup>85</sup>. At six weeks of age, CD8+ T cells  
458 infiltrate the intestinal tissue and the mucosa and intestinal lining resemble that of an adult pig<sup>79</sup>.

459 The increase of alpha diversity associated with weaning has been measured before<sup>81,82,88</sup>, but  
460 rarely using metrics that allow the distinction of absolute diversity from evenness. In this study,  
461 one week after weaning, piglets reached a comparable absolute diversity to the sows, at which  
462 time the piglets were aged between 3.8 and 4.6 weeks. Unrooted PD did not reach higher levels  
463 at later sampling time points. The highest BWPD accompanied by a high unrooted PD was  
464 reached after the second week post-weaning when piglets were aged between 4.9 and 5.6 weeks.  
465 Age-dependent physiological changes could explain i) the major shifts we detected in alpha  
466 diversity during the first two weeks after weaning and, ii) the distinct differences in community  
467 composition with age, even with a narrow age difference between piglets (1-5 days). We found a  
468 significant difference in microbial composition in both absolute diversity as in balance-weighted  
469 PD, only in the first week after weaning (piglets aged between 3.8 and 4.6 weeks), between  
470 groups of piglets that were separated by up to five days maximum by day of birth. Since age  
471 groups were confounded with breeds in our study, we attempted to determine the correlation



472 within single cross-breeds. Unfortunately, although the correlations with age could still be  
473 detected, we could not determine the association at later time points due to the introduction of  
474 treatment effects.

475 Animal trials are often conducted in controlled environments to minimize environmental  
476 effects. However, individual variations such as breed and age are often unavoidable in large  
477 animal trials, especially involving animals derived from commercial herds. Previously reported  
478 confounding factors include: individual variation, cohabitation, age, maternal effects, hormones,  
479 behavioural differences between breeds (*e.g.* coprophagy, mouth to mouth contact) and extent of  
480 long-term behavioural adaptation, which can differ between breeds for reasons not attributable to  
481 genetics<sup>84–86,89</sup>. A litter effect was found in piglets at the start of the trial (piglets aged between  
482 3.8 and 4.6 weeks; samples collected immediately after weaning) and was lost at later time  
483 points during the trial. This could be due to either of the aforementioned factors. Co-housing,  
484 aging and the splitting of the piglets in separate rooms to receive a different treatment, are  
485 possible causes for loss of the litter effect. In this study we confirm the importance of these  
486 factors in the contribution to inter-individual variability of gut microbial composition. Motta *et al*  
487 (2019) report a correlation of beta diversity with age and no correlation of genotype and litter  
488 effect with either alpha or beta diversity<sup>90</sup>. On the contrary, we found the piglet samples to  
489 significantly cluster by age and litter immediately after weaning in alpha diversity, and by age  
490 and cross-breed in beta diversity during the second week after weaning. Samples also clustered  
491 by age groups in beta diversity four weeks after weaning. The groups we tested, based on age,  
492 cross-breed, and litter, differed in sample sizes, therefore a non-parametric test was used to test  
493 for associations of host factors with phylogenetic diversity. Based on our results we conclude  
494 that even small age differences among post- weaning piglets, down to the day, must be  
495 accounted for in an experimental set up, but we acknowledge that the method we used may have  
496 less power to detect small effects than methods which make assumptions of balance in group  
497 sizes.

498 Three groups of piglets (cohorts neomycin, neomycin+D-Scour<sup>TM</sup> and  
499 neomycin+ColiGuard®) underwent five days of treatment with neomycin, via intramuscular  
500 administration. Intramuscular neomycin poorly diffuses (<10%) into a healthy gastrointestinal  
501 tract<sup>91</sup>, therefore a direct effect of neomycin on the gut microbiome may not be expected.

502 However, neomycin showed a different trend in unrooted PD between the second and the third  
503 week post-weaning, corresponding to the week following the neomycin treatment period for the  
504 neomycin cohort. Taking this time frame into consideration, the neomycin cohort did not  
505 increase in BWPD to the extent of the Control cohort. Although statistically significant  
506 differences between neomycin and Control in alpha diversity were not reached, possibly due to  
507 the effect being too small to detect within a relatively small sample size<sup>92-94</sup>, BWPD of the  
508 neomycin cohort appears to follow a different trend to the Control cohort from the first week  
509 (during neomycin treatment) where neomycin treated piglets show the lowest decrease of BWPD  
510 compared to the control cohort and all other cohorts. While all cohorts show an increase in  
511 absolute phylogenetic diversity accompanied by a decrease of diversity evenness during this time  
512 frame, the neomycin cohort piglets show a lower drop in BWPD, suggesting an increase of  
513 species richness, without a corresponding loss of species evenness. Furthermore the neomycin  
514 cohort significantly separated from the control cohort in beta diversity two weeks after neomycin  
515 treatment, showing a higher representation of *Mollicutes*. Numerous studies report the link of  
516 oral antibiotic use with dysbiosis<sup>10,14-17,86,95</sup>, as well as with host physiology changes<sup>15</sup>. On the  
517 contrary, the effect of intramuscular antibiotic administration on the microbiome is less well  
518 investigated. Correlation between intramuscular antibiotic use and dysbiosis has been reported in  
519 fish<sup>96</sup>, gorillas<sup>19</sup>, and pigs<sup>21,97</sup>. In one day old piglets, a single IM injection of amoxicillin  
520 (penicillin class) is reported to have an effect on the intestinal microbiota, detectable 40 days  
521 post treatment<sup>21</sup>. Zeineldin *et al* (2018) tested the effects of IM administration of several  
522 antibiotics of various classes (penicillin, macrolide, cephalosporin and tetracycline), in 8-week  
523 old piglets, reporting shifts of the *Firmicutes/Bacteroidetes* ratio following treatment (length of  
524 the treatment not reported)<sup>97</sup>. The effects of intramuscular administration of neomycin  
525 (aminoglycoside class) on the gut microbiota have to our knowledge not been investigated.  
526 Based on our results we conclude that a mild effect on phylogenetic diversity is appreciable post  
527 IM neomycin treatment, up to two weeks after termination of the treatment. Additional  
528 compositional and functional analysis is necessary to determine the source of this mild variation.  
529 Differences were not detected at later time points, based on our phylogenetic diversity analyses,  
530 suggesting a full recovery of the microbial communities after two weeks from the end of the  
531 treatment.

532 It is possible that the large shifts in phylogenetic diversity taking place in the first two weeks  
533 irrespective of the treatment (an increase, then decrease of unrooted PD, and an opposite trend of  
534 BWPD) have masked the milder effects of the treatment, despite our efforts to control for the  
535 effects of aging. This could be the reason why a significantly distinct alpha diversity trend was  
536 found in the neomycin+D-Scour™ cohort compared to the neomycin cohort, but not in the D-  
537 Scour™ cohort compared to the Control cohort. There are multiple studies reporting beneficial  
538 effects of probiotic treatment in sucker and weaner piglets in terms of improved gut mucosal  
539 integrity<sup>27,98</sup>, growth rate<sup>98-100</sup>, digestibility of proteins and water absorption<sup>98,101</sup>, reduction of  
540 pathogen invasion efficiency<sup>38,45,98</sup>, and decreased mortality<sup>98,100</sup>. Although the assessment of  
541 physiologic changes from probiotic treatments was outside the scope of this study, we found  
542 significant separation of neomycin+D-Scour™ cohort samples to neomycin cohort samples in  
543 beta diversity 2 and 12 days after D-Scour™ treatment, where neomycin+D-Scour™ samples  
544 showed a higher representation of *Lactobacillales* compared to neomycin samples, suggesting a  
545 transient establishment of the probiotic strains in the piglet guts.

546 The second probiotic in this study, ColiGuard®, did not have an effect on alpha diversity,  
547 but clustering was detected in beta diversity, where ColiGuard® samples separated from Control  
548 cohort samples in the first week of probiotic treatment and two weeks after probiotic treatment.  
549 Additionally, the ColiGuard® treatment correlated with a lower weight gain, whether or not it  
550 was preceded by the antibiotic treatment. However, when comparing the overall weight gain  
551 (from the start to the end of the trial, corresponding to the six weeks after weaning) the weight  
552 gain in the cohorts receiving ColiGuard® did not differ from the other cohorts.

553 We extracted the 16S rRNA gene hypervariable regions from our dataset, obtained the  
554 counts, and ran a correlation analysis to discover lineages that correlated with the weight of the  
555 piglets. As a consequence of the library size normalization step, the use of correlation with  
556 compositional data can inflate the false discovery rate<sup>102,103</sup>. For this reason it can be expected  
557 that some of the lineages we found to correlate with the weight of the piglets (eighty-three  
558 distinct species) could be spurious while other correlations may have been missed.

559 As our initial analysis of phylogenetic diversity was obtained using a 100K reads  
560 downsampling size per sample<sup>104</sup>, we wanted to test to what extent the use of a larger sampling

561 size would affect the diversity obtained from these samples. A 100K downsampling size  
562 corresponds to a 0.6% of reads of an average sample. Increasing the sampling size from 0.6% to  
563 6%, affected BWPD only slightly, while it increased the unrooted PD and decreased its variance.  
564 As expected, a larger sampling size enriches the absolute diversity by increasing the chance to  
565 make new read placements, and it lessens the variance in estimates, but it does not affect the core  
566 microbiome. However, the small difference between sampling sizes could 1. demonstrate how  
567 powerful the method is in describing diversity using a small sampling size, or 2. reflect the limits  
568 imposed by the phylogenetic markers database, as it was pointed out by Darling *et al* (2014)<sup>57</sup>.

569

## 570 **Conclusions**

571  
572 Our findings stress the importance of confounding factors such as breed, age and maternal  
573 effects when assessing the effect of treatment on the gut microbiome. We found that age, even  
574 within a narrow age span (1-5 days) can have an impact on microbial shifts and should be  
575 accounted for in microbiome studies, either (i). by accounting for it as a confounding variable in  
576 the hypothesis-testing model used, or (ii). by avoiding, where possible, the inclusion of subjects  
577 of different ages, or (iii). by allowing a sufficiently long period of time prior to the start of the  
578 treatment. The latter allows animals to become accustomed to the new environment and  
579 researchers to perform additional sampling. Allowing animals a sufficiently long period of time  
580 to become accustomed to the new environment (*e.g.*: temperature, humidity, new microbes, etc)  
581 is meant to reduce noise derived from external factors, while repeated sampling, likewise, aims  
582 to increase the confidence in the signal prior to treatment.

583 Intramuscular neomycin treatment correlated with a clustering in alpha diversity and a  
584 higher representation of *Mollicutes* compared to control. D-Scour™ treated piglets displayed a  
585 transient establishment of *Lactobacillales*. ColiGuard® treated piglets displayed a clustering in  
586 beta diversity and a transient lower weight gain compared to control. Weight correlated with the  
587 abundance of a number of lineages. Age was the strongest factor shaping phylogenetic diversity  
588 of the piglets.

589 As previously mentioned, phylogenetic diversity is based on distinct lineages (richness) and  
590 their collective structure (proportions reflected by BWPD) and not on a direct assessment of  
591 composition and function. These types of analyses will be necessary to further describe the  
592 effects of the treatments.

593

## 594 **Acknowledgements**

595 Shayne Fell is acknowledged for overseeing daily activities during the pig trial. Thanks to Amy  
596 Bottomley, Giulia Ballerin, and Rosy Cavaliere, for providing the mock community strains, and  
597 Akane Tanaka, Leigh Monahan, Michael Liu and Joyce To for the technical support. John  
598 Webster is thanked an internal review of this manuscript and for the helpful suggestions  
599 regarding its content. International Animal Health Products is acknowledged for providing  
600 access to the probiotic supplements used in this study.

601

## 602 **Conflicts of interest**

603 D-Scour™ was sourced from International Animal Health Products (IAHP). ColiGuard® was  
604 developed in a research project with NSW DPI, IAHP and AusIndustry Commonwealth  
605 government funding.

606

## 607 **Funding information**

608 This work was supported by the Australian Research Council, linkage grant LP150100912. This  
609 project was funded by the Australian Centre for Genomic Epidemiological Microbiology  
610 (Ausgem), a collaborative partnership between the NSW Department of Primary Industries and  
611 the University of Technology Sydney. TZ and DG are recipients of UTS International Research  
612 and UTS President's Scholarships. NSW DPI approved the paper before submission for  
613 publication.

614

615 **Captions:**

616

617 **Figure 1.** Workflow.

618 Schematic workflow from sample collection to sequencing (orange) and data analysis (green).

619 Scripts (*italic*) are available in our GitHub repository.

620

621 **Figure 2.** Significant correlations of phylogenetic diversity with specified host factors.

622 The correlation of host factors birth day, cross-breed, birth day within the D × L cross-breed, birth  
623 day within the D × LW cross-breed, line, litter (maternal sow and nurse sow) with alpha  
624 phylogenetic diversity (**A**) and beta phylogenetic diversity (**B**) from each time point (x-axes) was  
625 obtained. Shown in A and B are the significance values of these correlations derived from Kruskal-  
626 Wallis analysis, where the symbol shape indicates the phylogenetic diversity measure of alpha  
627 (unrooted pd and BWPD) and beta (PC components 1 to 5), while the symbol color indicates the  
628 significance before (black) and after (red) Hommel *p* value adjustment. C) For each red symbol in  
629 A and B, describing a significant correlation after Hommel *p* value adjustment, a plot of the  
630 phylogenetic diversity estimates is shown. Phylogenetic diversity estimates of the litter effect are  
631 not shown. All *p* values are reported in Supplementary Table 1. Abbreviations: D × L = “Duroc ×  
632 Landrace” cross breed; D × LW = “Duroc × Large White” cross breed.

633

634 **Figure 3.** Effect of time on beta diversity.

635 Principal component analysis (PCA) of samples. PCA from edge component analysis with  
636 PhyloSift (top) and PCA from 20 most abundant 16S reads extracted with SortMeRNA (bottom).  
637 In the top, distribution of samples on either side of the plot (left *versus* right; top *versus* bottom)  
638 reflect the lineages that were found to explain the variation. Samples are color coded by time post-  
639 weaning (days). In the lower plot, arrows indicate which of the 20 lineages contributed to the  
640 variation of samples across time, where arrows thickness represents a higher (thicker) or lower  
641 (thinner) contribution. Samples are color coded by time point during the trial (t0: start of the  
642 trial/first day after weaning; t10: last day of the trial/40th day after weaning).

643

644 **Figure 4.** Lineages displaying the highest variation in beta diversity across time.

645 Heatmap of lineages explaining the community composition of samples from separate time points  
646 of the trial (1 week interval between time points) derived from edge principal component analysis.  
647 Intensity is derived from branch width by the percentage of variability explained by the principal  
648 components.

649

650 **Supplementary Figure 1.** Batch effect on alpha and beta diversity before batch effect removal.

651 Batch effect by alpha (top two plots) and beta diversity (bottom five plots) before batch effect  
652 removal. Samples are grouped by DNA extraction plate. The *p* values are derived from multiple  
653 comparison analysis with ANOVA, indicating equality of the means. *Post hoc* corrected *p* values  
654 for pairwise comparisons are provided in Supplementary Table 1.

655

656 **Supplementary Figure 2.** Alpha phylogenetic diversity of cohorts.

657 Alpha phylogenetic diversity per cohort from samples across all time points. Balance-weighted  
658 phylogenetic diversity (BWPD) (top) (mean±SD: Positive control Mock community: 1.59±0.07;  
659 Positive control D-Scour™: 1.94±0.21; Positive control ColiGuard®: 0.86±0.14; Control:  
660 2.13±0.13; D-Scour™: 2.16±0.12; ColiGuard®: 2.12±0.12; neomycin: 2.12±0.16; neomycin+D-  
661 Scour™: 2.13±0.13; neomycin+ColiGuard®: 2.10±0.14; sows: 2.12±0.15; all piglet cohorts:  
662 2.13±0.13); Unrooted phylogenetic diversity (bottom) (mean±SD: Positive control Mock  
663 community: 123.62±24.41; Positive control D-Scour™: 162.14±28.27; Positive control  
664 ColiGuard®: 129.88±50.00; Control: 311.23±29.23; D-Scour™: 316.35±24.99; ColiGuard®:  
665 311.98±42.51; neomycin: 314.81±44.01; neomycin+D-Scour™: 312.66±40.18;  
666 neomycin+ColiGuard®: 316.29±31.20; sows: 328.51±24.00; all piglet cohorts: 313.86±36.00).

667

668 **Supplementary Figure 3.** Beta diversity of positive controls.

669 Principal component analysis (PCA) of positive control samples. PCA from edge component  
670 analysis with PhyloSift. Distribution of samples on either side of the plot (left *versus* right; top  
671 *versus* bottom) reflect the lineages that were found to explain the variation.

672

673 **Supplementary Figure 4.** Alpha phylogenetic diversity by age breed.

674 Alpha diversity of samples from the start of the trial (immediately after weaning) grouped by breed  
675 and by date of birth. Unrooted phylogenetic diversity (top) and balance-weighted phylogenetic  
676 diversity (bottom). P values are derived from Kruskal-Wallis analysis of variance. Piglets of the  
677 Duroc × Landrace breed ( $n=46$ ) separated significantly by age in unrooted phylogenetic diversity  
678 and in BWPD at the start of the trial ( $t_0$ ) (Hommel adjusted  $p$  value: unrooted  $pd=0.006$ ;  
679 BWPD= $0.047$ ). All post hoc corrected  $p$  values are provided in Supplementary Table 1.

680

681 **Supplementary Figure 5.** Relative abundance heatmap.

682 Most abundant lineages within each time point (columns) are obtained from analysis with guppy  
683 fat. Guppy fat outputs trees with fattened edges in proportion to the relative abundance of reads  
684 place in each lineage. The branch width of the trees, each corresponding to samples from distinct  
685 time points, are the entries for this heat map. The distance between each time point is one week.

686

687 **Supplementary Figure 6.** Time trend of alpha diversity by cohort.

688 Unrooted phylogenetic diversity (**A**) and balance-weighted phylogenetic diversity (**B**) describe  
689 richness and evenness, respectively, of alpha phylogenetic diversity for all samples across time,  
690 grouped and color coded by cohort. The  $p$  values derive from pairwise comparisons of time points  
691 of all treatment cohorts. The  $p$  values and *post hoc* corrected  $p$  values of time points comparisons  
692 for each separate treatment cohort are provided in Supplementary Table 1.

693

694 **Supplementary Figure 7.** Significant differences in beta diversity between cohorts at

695 specific time points.



696 Significance was determined by comparing groups by pairwise t-test and the resulting  $p$  values  
697 were adjusted with the Bonferroni method. Significance values are provided in Supplementary  
698 Table 1. The x-axes represent the principal component. As plots are derived from distinct guppy  
699 runs, each principal component explains variation to a different extent (percentage specified in  
700 parentheses). The number of samples is specified on the y-axis. Distribution of the samples on  
701 either side of a plot (left *versus* right) reflects the lineages that were found to explain the variation.  
702 Distributions are color coded by cohort.

703

704 **Supplementary Figure 8.** Change in weight gain of piglets by cohort across the trial.

705 On the y-axis of plots the change in weight gain between time points is provided in percentage.  
706 Letters on the top left of each plot indicate the time points compared with one week interval (t0-  
707 t2, t2-t4, t6-t8, t8-t10) and with two weeks interval (t2-t6, t4-t8, t0-t8). Pairwise t-test comparisons  
708 between cohorts were computed. A significant difference was found between Control and  
709 ColiGuard (t4-t6, Tukey adjusted  $p$  value=0.0084), between neomycin and neomycin+ColiGuard  
710 (t4-t6, Tukey adjusted  $p$  value=0.0152) and between neomycin and neomycin+ColiGuard (t4-t8,  
711 Tukey adjusted  $p$  value=0.011).

712

713 **Supplementary Figure 9.** Correlation of diversity indices between the analysis run using 100,000  
714 (100K) and 1,000,000 (1M) reads per sample.

715 Phylogenetic diversity analysis (alpha and beta) was run using either 100K or 1M reads per sample,  
716 corresponding to a 0.6% or 6% of the average sample. We show the Pearson's correlation of these  
717 analyses run using distinct downsampling sizes. Significance of correlations is reported within  
718 each plot. All the diversity indices are provided in Supplementary Table 1.

719

720 **Supplementary Table 1.** Statistical analysis output.

721 Statistical analysis output is split across the following sheets. **all\_padj\_Hommel** : list of  $p$  values  
722 obtained from running Kruskal-Wallis test, adjusted using the Hommel correction for  
723 phylogenetic diversity values: unrooted pd, BWPD, and five principal components. Grouping of

724 samples is based on: cross-breed, line, date of birth, date of birth within distinct cross-breeds,  
725 maternal sow and nurse sow. Sample size and sample collection date is reported. **all\_pvalues** :  
726 reports the *p* values of “all\_padj\_Hommel” sheet, prior to Hommel *p* value adjustment.  
727 **alpha\_delta\_cohorts** : deltas between time points are obtained per cohort and these deltas are  
728 compared using ANOVA, adjusting *p* values using the TukeyHSD method. **alpha\_means** : the  
729 means and standard deviations of alpha diversity (unrooted pd and BWPD) obtained per time  
730 point and cohort. **alpha\_time** : results of comparison between time points of alpha diversity  
731 (unrooted pd and BWPD) using the t-test and Bonferroni *p* value correction.  
732 **batch\_post\_process** : results of comparison of alpha diversity values by DNA extraction plate  
733 (1-10) after batch effect removal, run using ANOVA and TukeyHSD *p* value adjustment method.  
734 **batch\_pre\_process** : results of comparison of alpha diversity values by DNA extraction plate (1-  
735 10) before batch effect removal, run using ANOVA and TukeyHSD *p* value adjustment method.  
736 **deltas\_percent\_change** : comparison of alpha diversity values (unrooted pd and BWPD)  
737 between time points within distinct cohorts and within all cohorts. Sample size (*n*), deltas  
738 (percentage) are shown. **guppy\_padj** : *p* values from “guppy\_pvalues” are adjusted using the  
739 Bonferroni method and results are reported. **guppy\_pvalues** : output of single guppy runs is  
740 analyzed by comparing beta diversity values by cohort at each time point using the pairwise t  
741 test; results of the tests are here shown. **PD\_100K\_vs\_1M\_stats** : alpha and beta diversity values  
742 obtained with PhyloSift using either 100,000 reads or 1,000,000 reads downsampling size.  
743 **weight\_cohort\_stats** : piglets were weighted at each time point. Deltas are obtained per piglet  
744 and means were compared between cohorts using ANOVA and TukeyHSD *p* value correction,  
745 results are reported. **weight\_taxa** : Spearman’s rank correlation was assessed between pig weight  
746 and abundance of lineages obtained from 16S rRNA containing reads. Significance values are  
747 adjusted using the distinct methods listed.

748

749

750

751

752

753 **References**

754  
755  
756

- 757 1. Jensen, P. & Recén, B. When to wean — Observations from free-ranging domestic pigs.  
758 *Appl. Anim. Behav. Sci.* **23**, 49–60 (1989).
- 759 2. Jensen, P. Observations on the maternal behaviour of free-ranging domestic pigs. *Appl.*  
760 *Anim. Behav. Sci.* **16**, 131–142 (1986).
- 761 3. Lalles, J.-P., Bosi, P., Smidt, H. & Stokes, C. R. Nutritional management of gut health in  
762 pigs around weaning. *Proc. Nutr. Soc.* **66**, 260–268 (2007).
- 763 4. Van Heugten, E., Coffey, M. T. & Spears, J. W. Effects of immune challenge, dietary  
764 energy density, and source of energy on performance and immunity in weanling pigs. *J.*  
765 *Anim. Sci.* **74**, 2431–2440 (1996).
- 766 5. Nabuurs, M. J. A. Weaning piglets as a model for studying pathophysiology of diarrhea.  
767 *Vet. Q.* **20**, 42–45 (1998).
- 768 6. Heo, J. M. *et al.* Gastrointestinal health and function in weaned pigs: a review of feeding  
769 strategies to control post-weaning diarrhoea without using in-feed antimicrobial  
770 compounds. *J. Anim. Physiol. Anim. Nutr.* **97**, 207–237 (2013).
- 771 7. Jordan, D. *et al.* Antimicrobial use in the Australian pig industry: results of a national  
772 survey. *Aust. Vet. J.* **87**, 222–229 (2009).
- 773 8. Barton, M. D. Impact of antibiotic use in the swine industry. *Curr. Opin. Microbiol.* **19**, 9–15  
774 (2014).
- 775 9. Schokker, D. *et al.* Long-lasting effects of early-life antibiotic treatment and routine animal  
776 handling on gut microbiota composition and immune system in pigs. *PLoS One* **10**,  
777 e0116523 (2015).
- 778 10. Looft, T. P. *The swine intestinal microbiota: localized adaptations and responses to in-feed*  
779 *antibiotics*. (Iowa State University, 2012).

- 780 11. Zhang, D. *et al.* Changes in the diversity and composition of gut microbiota of weaned  
781 piglets after oral administration of Lactobacillus or an antibiotic. *Appl. Microbiol. Biotechnol.*  
782 **100**, 10081–10093 (2016).
- 783 12. Sachs, J. L., Mueller, U. G., Wilcox, T. P. & Bull, J. J. The evolution of cooperation. *Q. Rev.*  
784 *Biol.* **79**, 135–160 (2004).
- 785 13. Foster, K. R. & Wenseleers, T. A general model for the evolution of mutualisms. *J. Evol.*  
786 *Biol.* **19**, 1283–1293 (2006).
- 787 14. Cho, I. *et al.* Antibiotics in early life alter the murine colonic microbiome and adiposity.  
788 *Nature* **488**, 621–626 (2012).
- 789 15. Antunes, L. C. M. *et al.* Effect of Antibiotic Treatment on the Intestinal Metabolome.  
790 *Antimicrob. Agents Chemother.* **55**, 1494–1503 (2011).
- 791 16. Gonzalez-Perez, G. *et al.* Maternal Antibiotic Treatment Impacts Development of the  
792 Neonatal Intestinal Microbiome and Antiviral Immunity. *J. Immunol.* **196**, 3768–3779  
793 (2016).
- 794 17. Dethlefsen, L. & Relman, D. A. Incomplete recovery and individualized responses of the  
795 human distal gut microbiota to repeated antibiotic perturbation. *Proc. Natl. Acad. Sci.* **108**,  
796 4554–4561 (2011).
- 797 18. Kim, A. *et al.* Administration of antibiotics can cause dysbiosis in fish gut. *Aquaculture* **512**,  
798 734330 (2019).
- 799 19. Vlčková, K. *et al.* Effect of Antibiotic Treatment on the Gastrointestinal Microbiome of Free-  
800 Ranging Western Lowland Gorillas (*Gorilla g. gorilla*). *Microb. Ecol.* **72**, 943–954 (2016).
- 801 20. Thymann, T. *et al.* Antimicrobial treatment reduces intestinal microflora and improves  
802 protein digestive capacity without changes in villous structure in weanling pigs. *Br. J. Nutr.*  
803 **97**, 1128–1137 (2007).
- 804 21. Janczyk, P. *et al.* Parenteral long-acting amoxicillin reduces intestinal bacterial community  
805 diversity in piglets even 5 weeks after the administration. *ISME J.* **1**, 180–183 (2007).

- 806 22. Birck, M. M. *et al.* Enteral but not parenteral antibiotics enhance gut function and prevent  
807 necrotizing enterocolitis in formula-fed newborn preterm pigs. *Am. J. Physiol.-Gastrointest.*  
808 *Liver Physiol.* **310**, G323–G333 (2016).
- 809 23. Wiuff, C., Lykkesfeldt, J., Svendsen, O. & Aarestrup, F. M. The effects of oral and  
810 intramuscular administration and dose escalation of enrofloxacin on the selection of  
811 quinolone resistance among *Salmonella* and coliforms in pigs. *Res. Vet. Sci.* **75**, 185–193  
812 (2003).
- 813 24. Chantziaras, I., Smet, A., Haesebrouck, F., Boyen, F. & Dewulf, J. Studying the effect of  
814 administration route and treatment dose on the selection of enrofloxacin resistance in  
815 commensal *Escherichia coli* in broilers. *J. Antimicrob. Chemother.* **72**, 1991–2001 (2017).
- 816 25. Ricker, N. *et al.* Toward antibiotic stewardship: route of antibiotic administration impacts  
817 the microbiota and resistance gene diversity in swine feces. *Front. Vet. Sci.* **7**, 255 (2020).
- 818 26. Lessard, M. *et al.* Administration of *Pediococcus acidilactici* or *Saccharomyces cerevisiae*  
819 *boulardii* modulates development of porcine mucosal immunity and reduces intestinal  
820 bacterial translocation after *Escherichia coli* challenge<sup>1, 2</sup>. *J. Anim. Sci.* **87**, 922 (2009).
- 821 27. Deng, J., Li, Y., Zhang, J. & Yang, Q. Co-administration of *Bacillus subtilis* RJGP16 and  
822 *Lactobacillus salivarius* B1 strongly enhances the intestinal mucosal immunity of piglets.  
823 *Res. Vet. Sci.* **94**, 62–68 (2013).
- 824 28. Garrido-Mesa, N. *et al.* The association of minocycline and the probiotic *Escherichia coli*  
825 Nissle 1917 results in an additive beneficial effect in a DSS model of reactivated colitis in  
826 mice. *Biochem. Pharmacol.* **82**, 1891–1900 (2011).
- 827 29. Ukena, S. N. *et al.* Probiotic *Escherichia coli* Nissle 1917 Inhibits Leaky Gut by Enhancing  
828 Mucosal Integrity. *PLoS One* **2**, e1308 (2007).
- 829 30. Rangan, K. J. *et al.* A secreted bacterial peptidoglycan hydrolase enhances tolerance to  
830 enteric pathogens. *science* **353**, 1434–1437 (2016).

- 831 31. Deriu, E. *et al.* Probiotic bacteria reduce salmonella typhimurium intestinal colonization by  
832 competing for iron. *Cell Host Microbe* **14**, 26–37 (2013).
- 833 32. Hancock, V., Dahl, M. & Klemm, P. Probiotic *Escherichia coli* strain Nissle 1917  
834 outcompetes intestinal pathogens during biofilm formation. *J. Med. Microbiol.* **59**, 392–399  
835 (2010).
- 836 33. Heyman, M. Effect of lactic acid bacteria on diarrheal diseases. *J. Am. Coll. Nutr.* **19**,  
837 137S-146S (2000).
- 838 34. Jin, L.-Z., Marquardt, R. R. & Baidoo, S. K. Inhibition of enterotoxigenic *Escherichia coli*  
839 K88, K99 and 987P by the *Lactobacillus* isolates from porcine intestine. *J Sci Food Agric* **6**  
840 (2000).
- 841 35. Maltby, R., Leatham-Jensen, M. P., Gibson, T., Cohen, P. S. & Conway, T. Nutritional  
842 basis for colonization resistance by human commensal *Escherichia coli* strains HS and  
843 Nissle 1917 against *E. coli* O157: H7 in the mouse intestine. *PloS One* **8**, e53957 (2013).
- 844 36. Suda, Y. *et al.* Immunobiotic *Lactobacillus jensenii* as immune-health promoting factor to  
845 improve growth performance and productivity in post-weaning pigs. *BMC Immunol.* **15**, 24  
846 (2014).
- 847 37. Shimazu, T. *et al.* Immunobiotic *Lactobacillus jensenii* Elicits Anti-Inflammatory Activity in  
848 Porcine Intestinal Epithelial Cells by Modulating Negative Regulators of the Toll-Like  
849 Receptor Signaling Pathway. *Infect. Immun.* **80**, 276–288 (2012).
- 850 38. Splichalova, A. *et al.* Interference of *Bifidobacterium choerinum* or *Escherichia coli* Nissle  
851 1917 with *Salmonella Typhimurium* in gnotobiotic piglets correlates with cytokine patterns  
852 in blood and intestine. *Clin. Exp. Immunol.* **163**, 242–249 (2011).
- 853 39. Roselli, M. *et al.* The novel porcine *Lactobacillus sobrius* strain protects intestinal cells from  
854 enterotoxigenic *Escherichia coli* K88 infection and prevents membrane barrier damage. *J.*  
855 *Nutr.* **137**, 2709–2716 (2007).

- 856 40. Bomba, A., Nemcová, R., Gancarčíková, S., Herich, R. & Kaštel, R. Potentiation of the  
857 effectiveness of *Lactobacillus casei* in the prevention of *E. coli* induced diarrhea in  
858 conventional and gnotobiotic pigs. in *Mechanisms in the pathogenesis of enteric diseases*  
859 2 185–190 (Springer, 1999).
- 860 41. Nemcova, R., Bomba, A., Gancarcikova, S., Herich, R. & Guba, P. Study of the effect of  
861 *Lactobacillus paracasei* and fructooligosaccharides on the faecal microflora in weanling  
862 piglets. *Berl. Munch. Tierarztl. Wochenschr.* **112**, 225–228 (1999).
- 863 42. Estrada, A., Drew, M. D. & Van Kessel, A. Effect of the dietary supplementation of  
864 fructooligosaccharides and *Bifidobacterium longum* to early-weaned pigs on performance  
865 and fecal bacterial populations. *Can. J. Anim. Sci.* **81**, 141–148 (2001).
- 866 43. Huang, C., Qiao, S., Li, D., Piao, X. & Ren, J. Effects of *Lactobacilli* on the performance,  
867 diarrhea incidence, VFA concentration and gastrointestinal microbial flora of weaning pigs.  
868 *Asian-Australas. J. Anim. Sci.* **17**, 401–409 (2004).
- 869 44. De Angelis, M. *et al.* Survival and persistence of *Lactobacillus plantarum* 4.1 and  
870 *Lactobacillus reuteri* 3S7 in the gastrointestinal tract of pigs. *Vet. Microbiol.* **123**, 133–144  
871 (2007).
- 872 45. Šmajš, D. *et al.* Experimental Administration of the Probiotic *Escherichia coli* Strain Nissle  
873 1917 Results in Decreased Diversity of *E. coli* Strains in Pigs. *Curr. Microbiol.* **64**, 205–210  
874 (2012).
- 875 46. Liu, H. *et al.* Oral administration of *Lactobacillus fermentum* I5007 favors intestinal  
876 development and alters the intestinal microbiota in formula-fed piglets. *J. Agric. Food*  
877 *Chem.* **62**, 860–866 (2014).
- 878 47. Zhao, P. & Kim, I. Effect of direct-fed microbial on growth performance, nutrient  
879 digestibility, fecal noxious gas emission, fecal microbial flora and diarrhea score in  
880 weanling pigs. *Anim. Feed Sci. Technol.* **200**, 86–92 (2015).

- 881 48. Dowarah, R., Verma, A. K. & Agarwal, N. The use of *Lactobacillus* as an alternative of  
882 antibiotic growth promoters in pigs: A review. *Anim. Nutr.* **3**, 1–6 (2017).
- 883 49. Pieper, R. *et al.* Effect of a single oral administration of *Lactobacillus plantarum* DSMZ  
884 8862/8866 before and at the time point of weaning on intestinal microbial communities in  
885 piglets. *Int. J. Food Microbiol.* **130**, 227–232 (2009).
- 886 50. Chae, J. P., Pajarillo, E. A. B., Oh, J. K., Kim, H. & Kang, D.-K. Revealing the combined  
887 effects of lactulose and probiotic enterococci on the swine faecal microbiota using 454  
888 pyrosequencing. *Microb. Biotechnol.* **9**, 486–495 (2016).
- 889 51. Xu, J. *et al.* Yeast probiotics shape the gut microbiome and improve the health of early-  
890 weaned piglets. *Front. Microbiol.* **9**, 2011 (2018).
- 891 52. Solano-Aguilar, G. I. *et al.* The effect of feeding cocoa powder and *Lactobacillus*  
892 *rhamnosus* on the composition and function of pig intestinal microbiome. *Curr. Dev. Nutr.*  
893 **2**, nzy011 (2018).
- 894 53. Shin, D. *et al.* Beneficial roles of probiotics on the modulation of gut microbiota and  
895 immune response in pigs. *PLoS One* **14**, e0220843 (2019).
- 896 54. Gaio, D. *et al.* A large-scale metagenomic survey dataset of the post-weaning piglet gut  
897 lumen. *GigaScience* (2021).
- 898 55. Gaio, D. *et al.* Hackflex: low cost Illumina sequencing library construction for high sample  
899 counts. *bioRxiv* 779215 (2019).
- 900 56. Ewels, P., Magnusson, M., Lundin, S. & Källner, M. MultiQC: summarize analysis results for  
901 multiple tools and samples in a single report. *Bioinformatics* **32**, 3047–3048 (2016).
- 902 57. Darling, A. E. *et al.* PhyloSift: phylogenetic analysis of genomes and metagenomes. *PeerJ*  
903 **2**, e243 (2014).
- 904 58. Faith, D. P. Conservation evaluation and phylogenetic diversity. *Biol. Conserv.* **61**, 1–10  
905 (1992).



- 906 59. McCoy, C. O. & Matsen, F. A. Abundance-weighted phylogenetic diversity measures  
907 distinguish microbial community states and are robust to sampling depth. *PeerJ* **1**, e157  
908 (2013).
- 909 60. Evans, S. N. & Matsen, F. A. The phylogenetic Kantorovich-Rubinstein metric for  
910 environmental sequence samples. *J. R. Stat. Soc. Ser. B Stat. Methodol.* **74**, 569–592  
911 (2012).
- 912 61. R Core Team, R. C. T. R: A language and environment for statistical computing. (2013).
- 913 62. Wickham, H., Hester, J. & Francois, R. *readr: Read Rectangular Text Data*. (2018).
- 914 63. Wickham, H. & Bryan, J. *readxl: Read Excel Files*. (2019).
- 915 64. Wickham, H., François, R., Henry, L. & Müller, K. *dplyr: A Grammar of Data Manipulation*.  
916 (2019).
- 917 65. Wickham, H. *et al.* Welcome to the tidyverse. *J. Open Source Softw.* **4**, 1686 (2019).
- 918 66. Robinson, D. & Hayes, A. *broom: Convert Statistical Analysis Objects into Tidy Tibbles*.  
919 (2019).
- 920 67. Vu, V. Q. *ggbiplot: A ggplot2 based biplot*. (2011).
- 921 68. Pinheiro, J., Bates, D., DebRoy, S., Sarkar, D. & R. Core Team. *nlme: Linear and*  
922 *Nonlinear Mixed Effects Models*. (2019).
- 923 69. Kassambara, A. *ggpubr: 'ggplot2' Based Publication Ready Plots*. (2019).
- 924 70. Mahto, A. *splitstackshape: Stack and Reshape Datasets After Splitting Concatenated*  
925 *Values*. (2019).
- 926 71. Kassambara, A. *rstatix: Pipe-Friendly Framework for Basic Statistical Tests*. (2019).
- 927 72. Henry, L. & Wickham, H. *purrr: Functional Programming Tools*. (2019).
- 928 73. Dinno, A. *dunn.test: Dunn's Test of Multiple Comparisons Using Rank Sums*. (2017).
- 929 74. Auguie, B. *gridExtra: Miscellaneous Functions for 'Grid' Graphics*. (2017).
- 930 75. Bache, S. M. & Wickham, H. *magrittr: A Forward-Pipe Operator for R*. (2014).
- 931 76. Bates, D. & Maechler, M. *Matrix: Sparse and Dense Matrix Classes and Methods*. (2019).

- 932 77. Kopylova, E., Noé, L. & Touzet, H. SortMeRNA: fast and accurate filtering of ribosomal  
933 RNAs in metatranscriptomic data. *Bioinformatics* **28**, 3211–3217 (2012).
- 934 78. Johnson, W. E., Li, C. & Rabinovic, A. Adjusting batch effects in microarray expression  
935 data using empirical Bayes methods. *Biostatistics* **8**, 118–127 (2007).
- 936 79. Kembel, S. W. *et al.* Architectural design influences the diversity and structure of the built  
937 environment microbiome. *ISME J.* **6**, 1469–1479 (2012).
- 938 80. Pollock, J. *et al.* Analysis of temporal fecal microbiota dynamics in weaner pigs with and  
939 without exposure to enterotoxigenic *Escherichia coli*. *J. Anim. Sci.* **96**, 3777–3790 (2018).
- 940 81. Frese, S. A., Parker, K., Calvert, C. C. & Mills, D. A. Diet shapes the gut microbiome of  
941 pigs during nursing and weaning. *Microbiome* **3**, 28 (2015).
- 942 82. Meng, Q. *et al.* Weaning alters intestinal gene expression involved in nutrient metabolism  
943 by shaping gut microbiota in pigs. *Front. Microbiol.* **11**, 694 (2020).
- 944 83. Guevarra, R. B. *et al.* Piglet gut microbial shifts early in life: causes and effects. *J. Anim.*  
945 *Sci. Biotechnol.* **10**, 1 (2019).
- 946 84. Pajarillo, E. A. B., Chae, J. P., Kim, H. B., Kim, I. H. & Kang, D.-K. Barcoded  
947 pyrosequencing-based metagenomic analysis of the faecal microbiome of three purebred  
948 pig lines after cohabitation. *Appl. Microbiol. Biotechnol.* **99**, 5647–5656 (2015).
- 949 85. Thompson, C. L., Wang, B. & Holmes, A. J. The immediate environment during postnatal  
950 development has long-term impact on gut community structure in pigs. *ISME J.* **2**, 739  
951 (2008).
- 952 86. Xiao, L. *et al.* A reference gene catalogue of the pig gut microbiome. *Nat. Microbiol.* **1**,  
953 16161 (2016).
- 954 87. Bailey, M. *et al.* Regulation of mucosal immune responses in effector sites. *Proc. Nutr.*  
955 *Soc.* **60**, 427–435 (2001).
- 956 88. Wang, W., Hu, H., Zijlstra, R. T., Zheng, J. & Gänzle, M. G. Metagenomic reconstructions  
957 of gut microbial metabolism in weanling pigs. *Microbiome* **7**, 1–11 (2019).

- 958 89. Funkhouser, L. J. & Bordenstein, S. R. Mom knows best: the universality of maternal  
959 microbial transmission. *PLoS Biol* **11**, e1001631 (2013).
- 960 90. Motta, V., Luise, D., Bosi, P. & Trevisi, P. Faecal microbiota shift during weaning transition  
961 in piglets and evaluation of AO blood types as shaping factor for the bacterial community  
962 profile. *PloS One* **14**, e0217001 (2019).
- 963 91. Ludlow, K. Australian Pesticides and Veterinary Medicines Authority. in *Encyclopedia of*  
964 *Nanoscience and Society* (SAGE Publications, Inc., 2010).  
965 doi:10.4135/9781412972093.n22.
- 966 92. Button, K. S. *et al.* Power failure: why small sample size undermines the reliability of  
967 neuroscience. *Nat. Rev. Neurosci.* **14**, 365–376 (2013).
- 968 93. Dirnagl, U. *The p value wars (again)*. (Springer, 2019).
- 969 94. Anderson, S. F. Misinterpreting p: The discrepancy between p values and the probability  
970 the null hypothesis is true, the influence of multiple testing, and implications for the  
971 replication crisis. *Psychol. Methods* **25**, 596 (2020).
- 972 95. Deshmukh, H. S. *et al.* The microbiota regulates neutrophil homeostasis and host  
973 resistance to *Escherichia coli* K1 sepsis in neonatal mice. *Nat. Med.* **20**, 524–530 (2014).
- 974 96. Kim, P. I. *et al.* Probiotic properties of *Lactobacillus* and *Bifidobacterium* strains isolated  
975 from porcine gastrointestinal tract. *Appl. Microbiol. Biotechnol.* **74**, 1103–1111 (2007).
- 976 97. Zeineldin, M., Aldridge, B., Blair, B., Kancer, K. & Lowe, J. Impact of parenteral  
977 antimicrobial administration on the structure and diversity of the fecal microbiota of growing  
978 pigs. *Microb. Pathog.* **118**, 220–229 (2018).
- 979 98. Valeriano, V. D. V., Balolong, M. P. & Kang, D. K. Probiotic roles of *Lactobacillus* sp. in  
980 swine: insights from gut microbiota. *J. Appl. Microbiol.* **122**, 554–567 (2017).
- 981 99. Abe, F., Ishibashi, N. & Shimamura, S. Effect of administration of bifidobacteria and lactic  
982 acid bacteria to newborn calves and piglets. *J. Dairy Sci.* **78**, 2838–2846 (1995).

- 983 100. Davis, M. E. *et al.* Effect of a Bacillus-based direct-fed microbial feed supplement on  
984 growth performance and pen cleaning characteristics of growing-finishing pigs. *J. Anim.*  
985 *Sci.* **86**, 1459–1467 (2008).
- 986 101. Chu, G. M., Lee, S. J., Jeong, H. S. & Lee, S. S. Efficacy of probiotics from anaerobic  
987 microflora with prebiotics on growth performance and noxious gas emission in growing  
988 pigs: SYNBIOTICS ON NOXIOUS GAS EMISSION IN PIGS. *Anim. Sci. J.* **82**, 282–290  
989 (2011).
- 990 102. Friedman, J. & Alm, E. J. Inferring Correlation Networks from Genomic Survey Data. *PLoS*  
991 *Comput. Biol.* **8**, e1002687 (2012).
- 992 103. Lovell, D., Pawlowsky-Glahn, V., Egozcue, J. J., Marguerat, S. & Bähler, J. Proportionality:  
993 A Valid Alternative to Correlation for Relative Data. *PLOS Comput. Biol.* **11**, e1004075  
994 (2015).
- 995 104. Gaio, D. *et al.* Community composition and development of the post-weaning piglet gut  
996 microbiome. *bioRxiv* 211326 (2020).
- 997  
998  
999

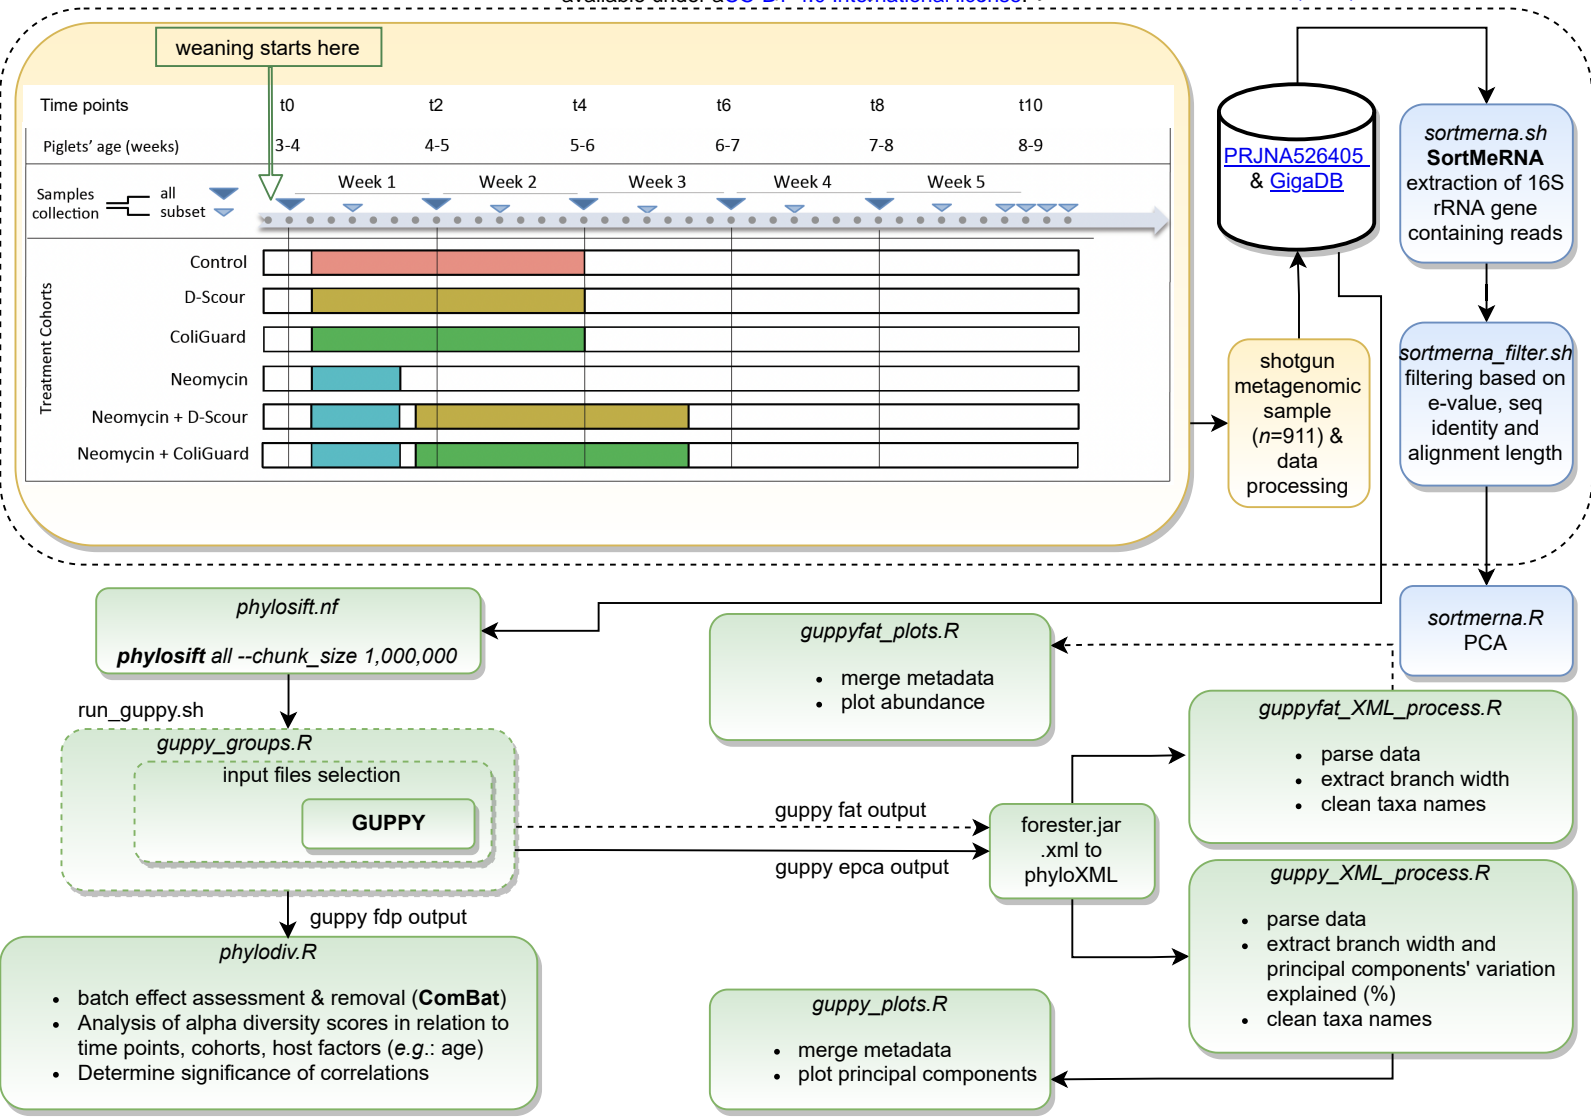

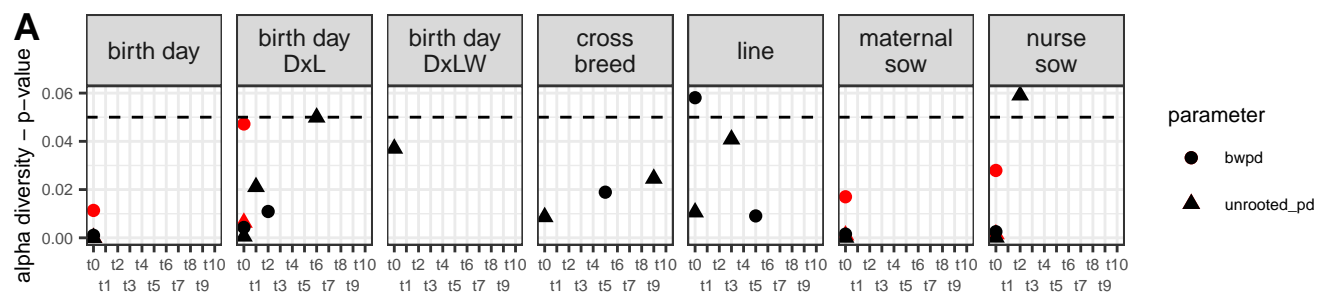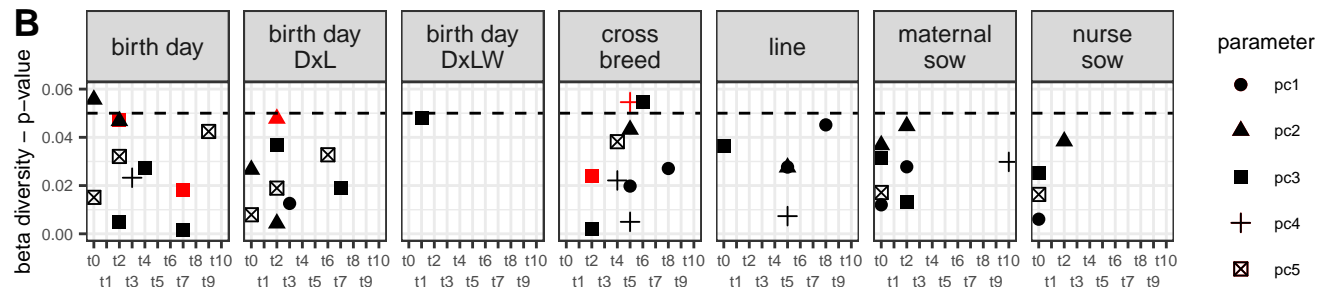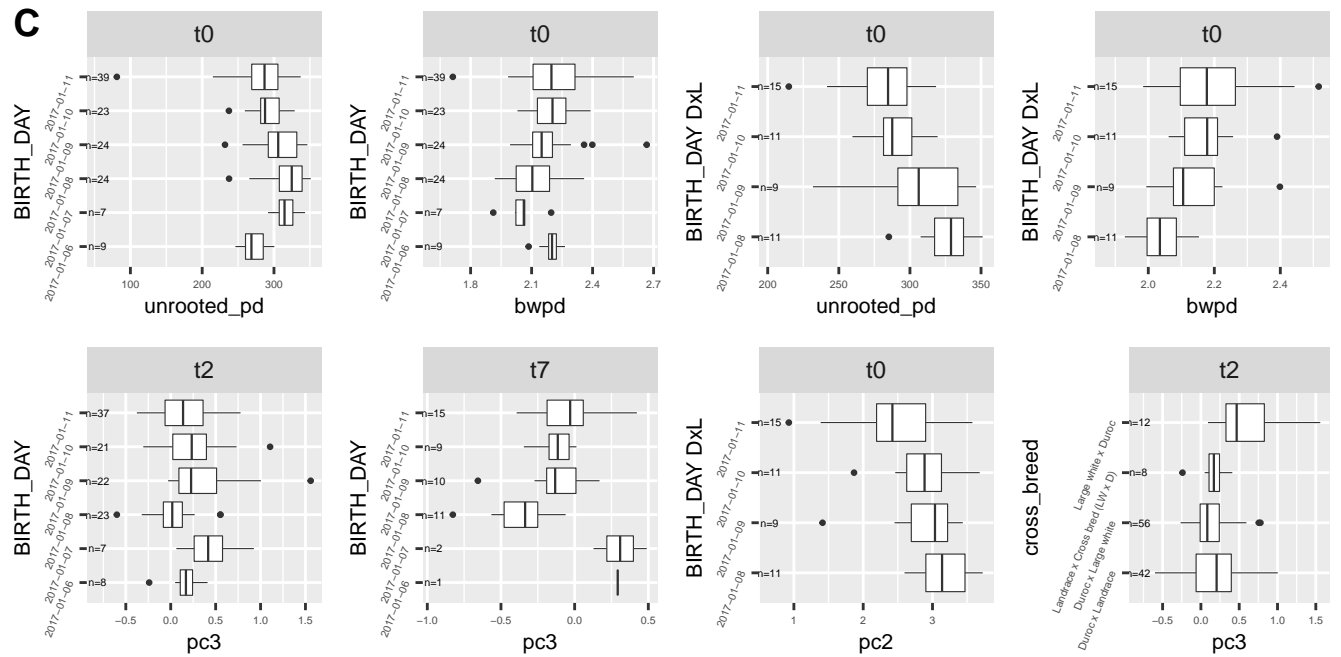



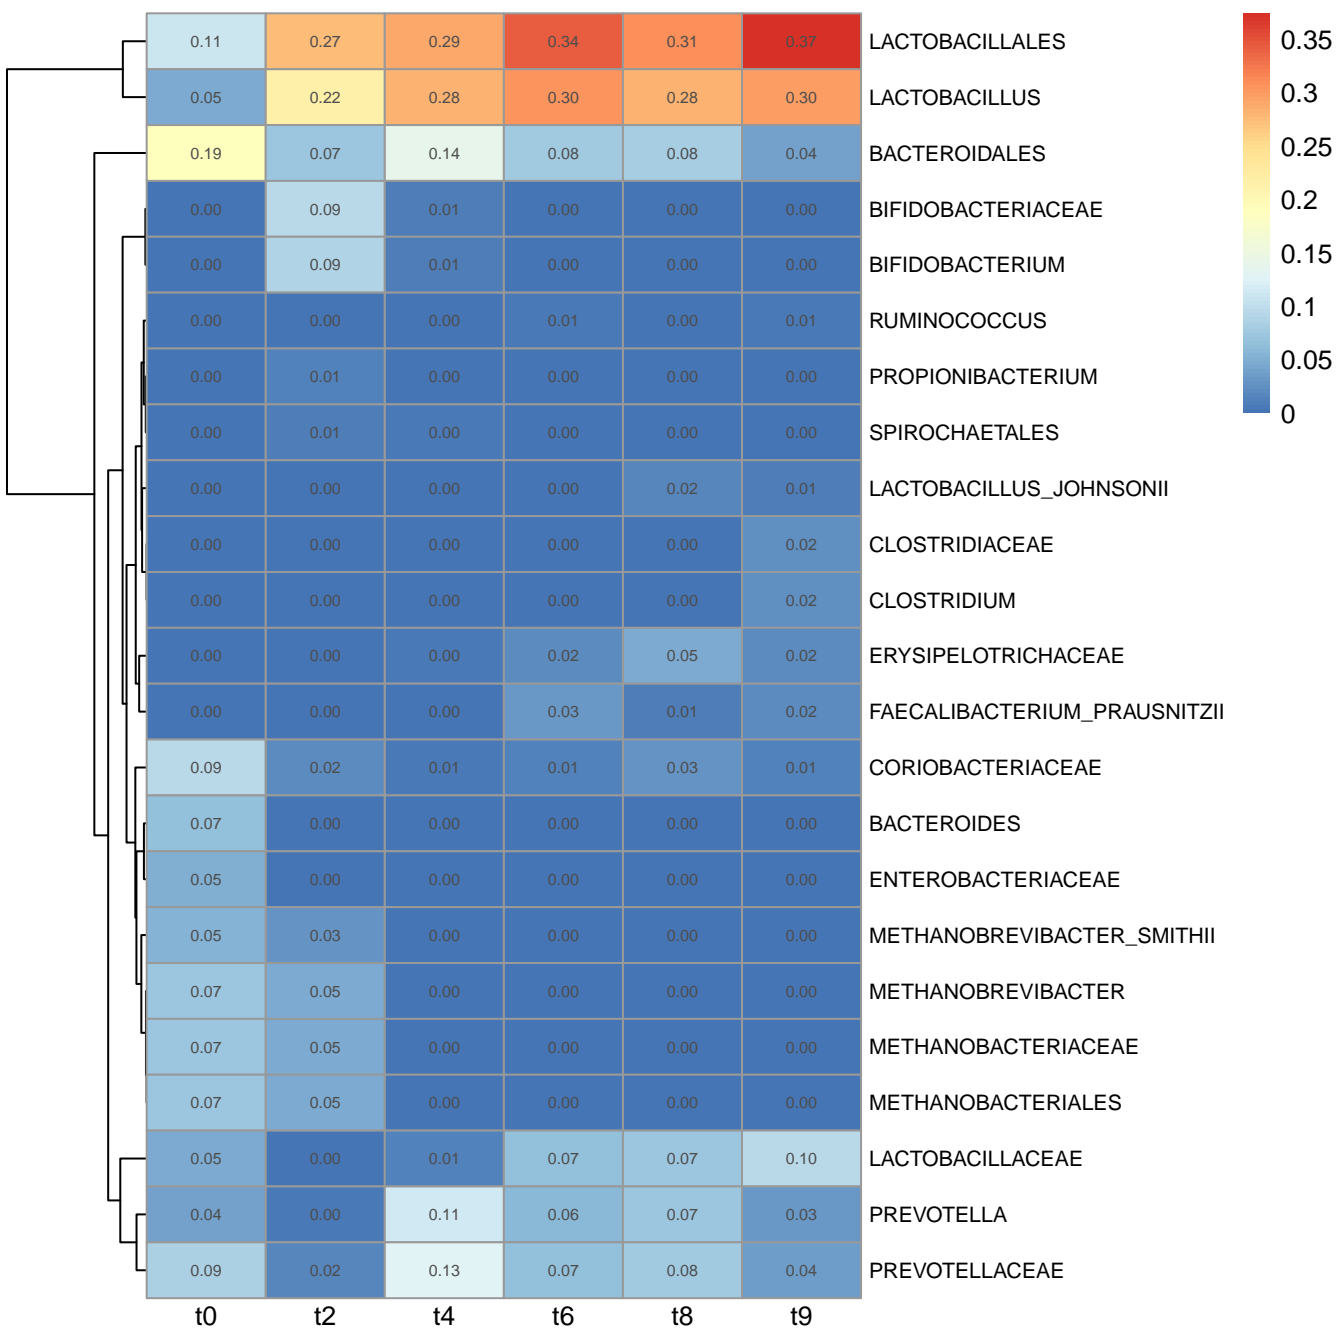

Source: https://www.biorxiv.org/content/10.1101/2020.07.20.211326v2.full.pdf
