# Supplementary material for: Phylogenetic diversity analysis of shotgun metagenomic reads describes gut microbiome development and treatment effects in the post-weaned pig
Source: bioRxiv or medRxiv preprint supplement (doi:10.1101/2020.07.20.211326), 2022-02-03
Supplement: Supplementary file [file media-3.pdf]

Cohort     MockCommunity     PosControl\_D-Scour     PosControl\_ColiGuard

ACTINOBACTERIA  
BIFIDOBACTERIACEAE  
BIFIDOBACTERIUM  
ENTEROCOCCACEAE  
ENTEROCOCCUS  
ENTEROCOCCUS\_FAECIUM  
FIRMICUTES  
LACTOBACILLUS\_DELBRUECKII

PC2 (14.52%)

0.0

-2.5

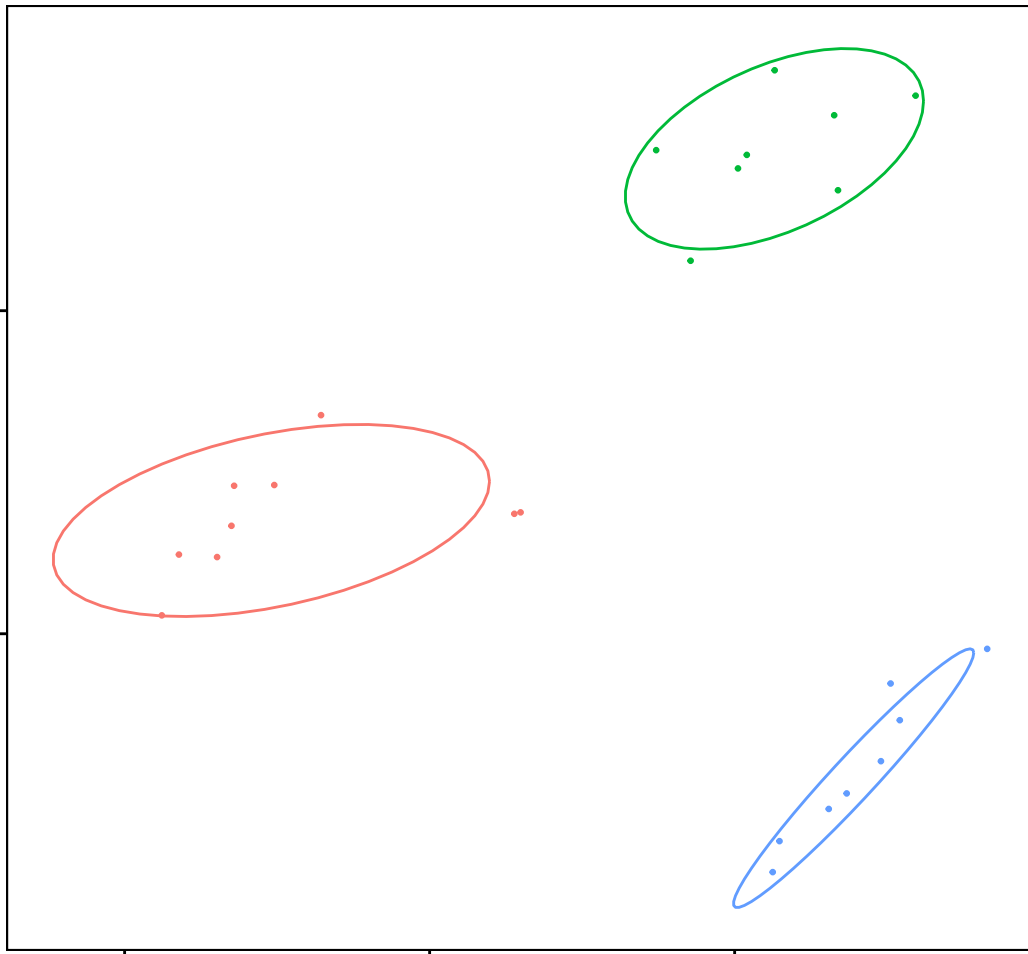

-5

PC1 (83.62%)

0

5

BACILLI  
ENTEROBACTERIACEAE  
GAMMAPROTEOBACTERIA  
LACTOBACILLALES  
LACTOBACILLUS  
PROTEOBACTERIA

ENTEROBACTER  
ENTEROBACTERIACEAE  
GAMMAPROTEOBACTERIA  
PROTEOBACTERIA  
PSEUDOMONADACEAE  
PSEUDOMONAS

BACILLI  
FIRMICUTES  
LACTOBACILLALES  
LACTOBACILLUS
