# Supplementary material for: Phylogenetic diversity analysis of shotgun metagenomic reads describes gut microbiome development and treatment effects in the post-weaned pig
Source: bioRxiv or medRxiv preprint supplement (doi:10.1101/2020.07.20.211326), 2022-02-03

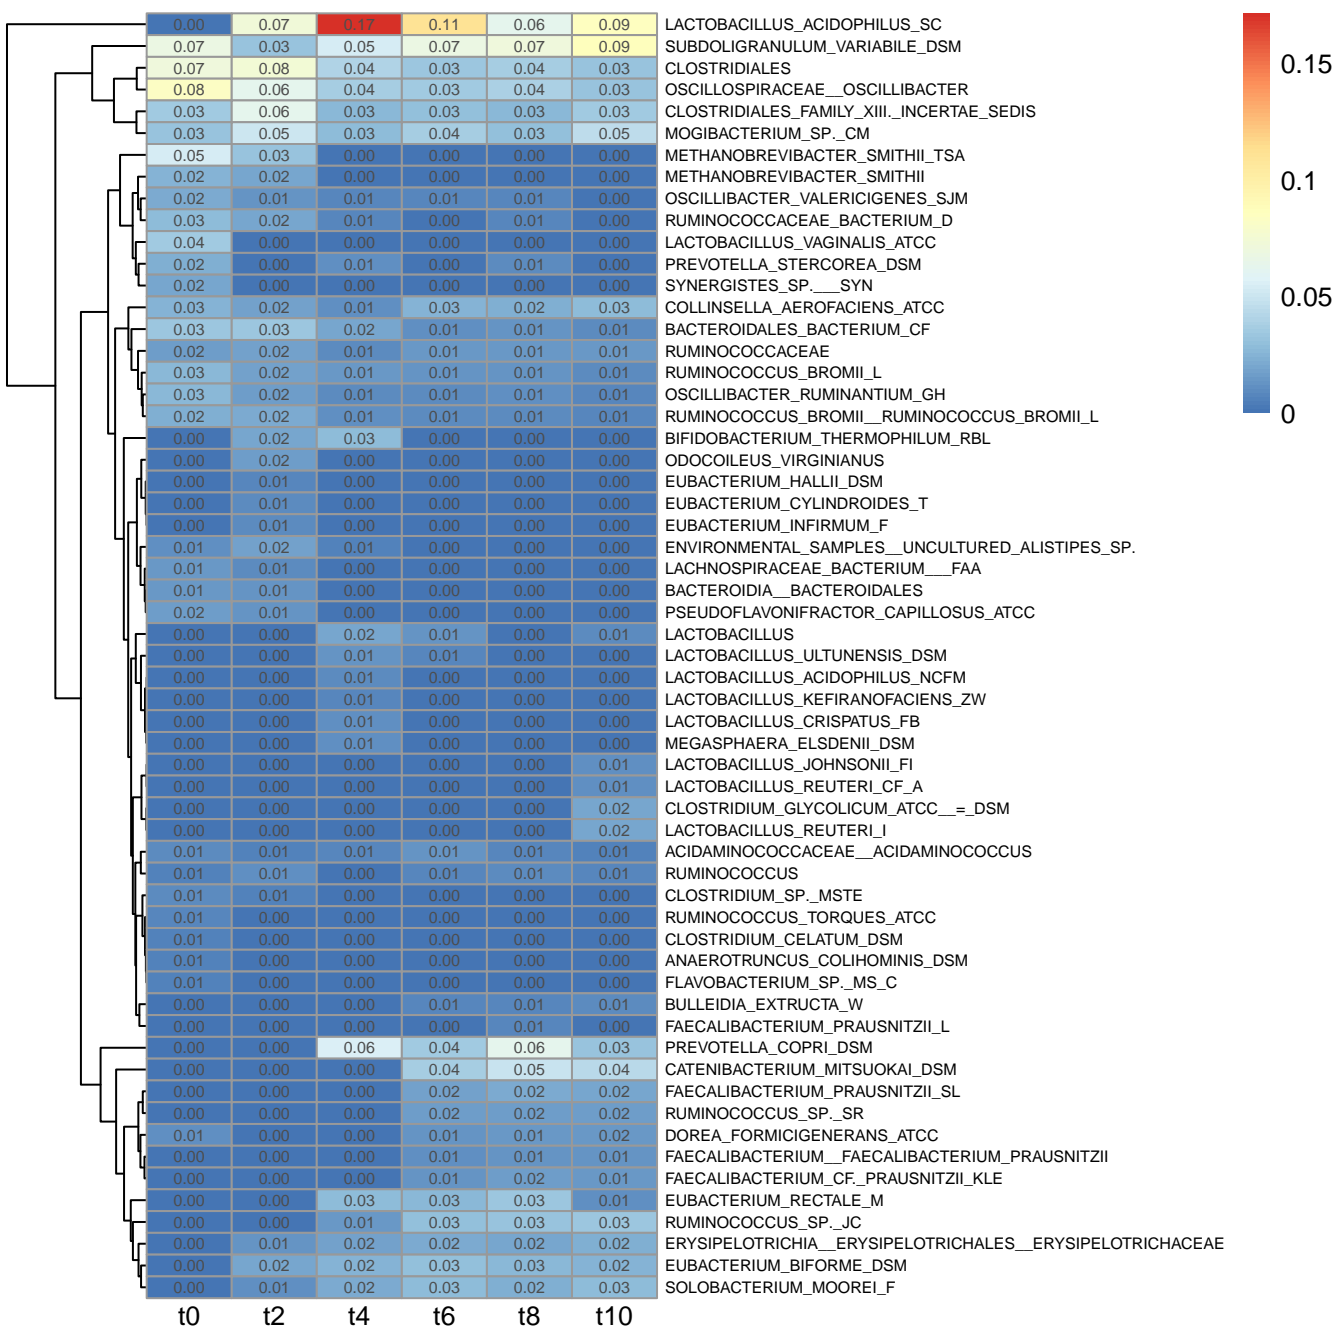

Supplement: Supplementary file [file media-5.pdf]
