# Supplementary material for: Phylogenetic diversity analysis of shotgun metagenomic reads describes gut microbiome development and treatment effects in the post-weaned pig
Source: bioRxiv or medRxiv preprint supplement (doi:10.1101/2020.07.20.211326), 2022-02-03

Cohort

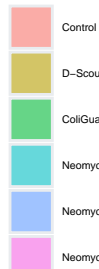

t2

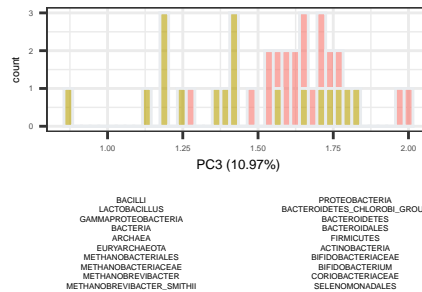

t2

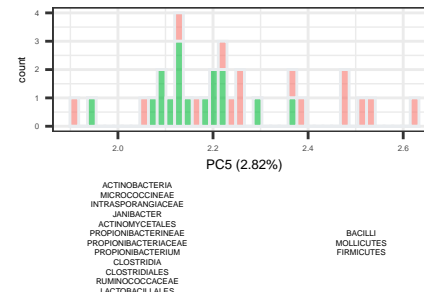

t2

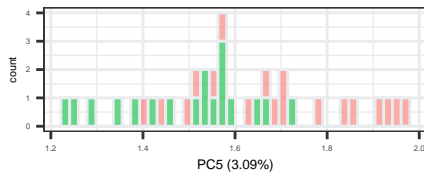

t8

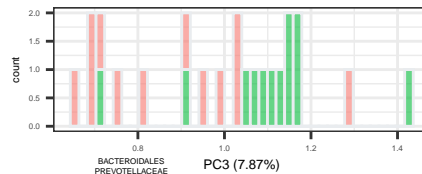

t8

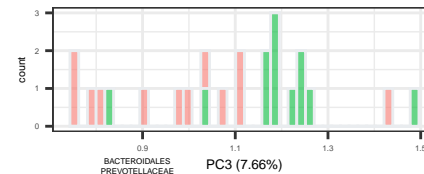

t6

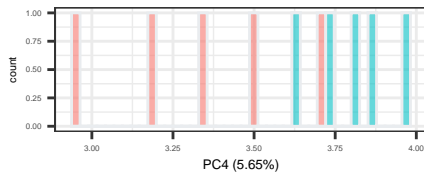

t6

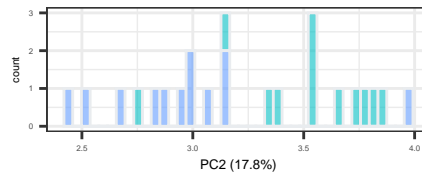

t6

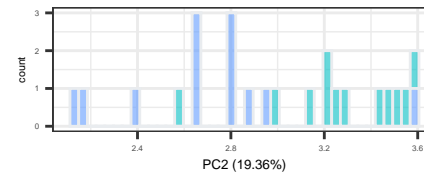

t6

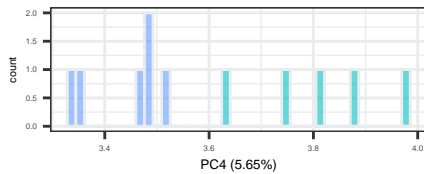

t9

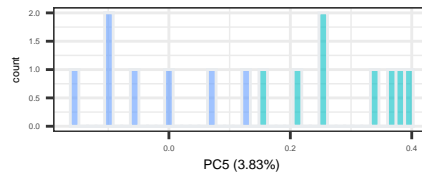

t9

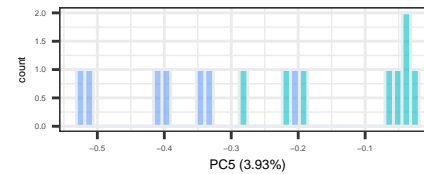

Supplement: Supplementary file [file media-7.pdf]
